# Supplementary material for: X-ray absorption spectroscopy of FeH+ to aid its identification in astrochemical environments
Source: Chem Commun (Camb). 2024 Dec 17;61(10):2048–50. doi: 10.1039/d4cc04702h (PMC11694246; doi:10.1039/d4cc04702h)
Supplement: CC-061-D4CC04702H-s001 [file CC-061-D4CC04702H-s001.xlsx]

## Sheet: Sheet1
Fig 1 (a)							Fig 1 (b)							Fig 2
FeH+ High Res		FeH+ Overview		CTM Simulation			Fe+ High Res		Fe+ Overview		CTM Simulation			Cygnus X-1		Fe+		FeH+
Energy	Intensity	Energy	Intensity	Energy	Intensity		Energy	Intensity	Energy	Intensity	Energy	Intensity		Energy	Flux	Energy	Flux	Energy	Flux
eV	arb. units	eV	arb. units	eV	arb. units		eV	arb. units	eV	arb. units	eV	arb. units		eV	arb	eV	arb	eV	arb
702.15	-0.00217	700.15	-0.02682	703.954	0.00775		702.017	0.000766118	699.99	0.00183	704.145	0.00538		660.263	0.68727	700.555	1.14109	700.555	1.1154
702.18	-0.00579	700.23	0.00579	703.963	0.00794		702.047	0.00139	699.99	0.00183	704.153	0.00563		661.531	0.72488	701.983	1.15163	701.983	1.12497
702.21	-0.00179	700.31	0.00527	703.972	0.00813		702.077	0	700.07	0	704.162	0.00587		662.804	0.68576	703.417	1.15994	703.417	1.1297
702.24	-0.0053	700.39	-0.01351	703.981	0.00832		702.107	0.000804776	700.15	0.000348529	704.171	0.00611		664.082	0.71675	704.856	1.14804	704.856	1.10366
702.27	0.01799	700.47	0.000454178	703.99	0.00851		702.137	0.000899212	700.23	0.00119	704.179	0.00634		665.365	0.73904	706.302	1.06995	706.302	1.00284
702.3	0.00143	700.55	-0.00164	703.999	0.0087		702.167	0.00146	700.31	0.00108	704.188	0.00658		666.653	0.76503	707.753	0.97224	707.753	0.92305
702.33	0.00589	700.63	-0.01365	704.008	0.00889		702.197	0.00115	700.39	0.000406542	704.197	0.00681		667.946	0.78303	709.211	1.03618	709.211	0.99389
702.36	0.00913	700.71	-0.03048	704.017	0.00907		702.227	0.0016	700.47	0.000924599	704.205	0.00704		669.244	0.80772	710.674	1.14527	710.674	1.09851
702.39	0.0035	700.79	-0.02204	704.026	0.00925		702.257	0.00173	700.55	0.000649456	704.214	0.00727		670.547	0.81951	712.144	1.20195	712.144	1.16041
702.42	-0.000682846	700.87	-0.01005	704.035	0.00943		702.287	0.00121	700.63	0.000146461	704.223	0.00749		671.855	0.85573	713.619	1.23691	713.619	1.19537
702.45	-0.00935	700.95	-0.01106	704.044	0.0096		702.317	0.000832191	700.71	0.000249689	704.231	0.0077		673.169	0.83772	715.101	1.25822	715.101	1.21286
702.48	0.01117	701.03	-0.00746	704.053	0.00977		702.347	0.00247	700.79	0.000746272	704.24	0.00791		674.487	0.84982	716.589	1.27328	716.589	1.2214
702.51	-0.000929753	701.11	-0.01928	704.062	0.00994		702.377	0.00152	700.87	0.000781415	704.249	0.00811		675.81	0.87924	718.083	1.27903	718.083	1.21647
702.54	-0.00655	701.19	-0.02002	704.071	0.0101		702.407	0.00103	700.95	0.000600691	704.257	0.00831		677.139	0.85744	719.583	1.26142	719.583	1.18949
702.57	-0.01128	701.27	-0.00333	704.08	0.01026		702.437	0.00111	701.03	4.57852e-05	704.266	0.0085		678.473	0.90661	721.09	1.25581	721.09	1.18277
702.6	-0.0087	701.35	-0.00459	704.089	0.01041		702.467	0.00131	701.11	6.51693e-05	704.275	0.00868		679.812	0.92144	722.603	1.29166	722.603	1.21761
702.63	0.0024	701.43	-0.01303	704.098	0.01056		702.497	0.00083705	701.19	0.000708387	704.283	0.00886		681.157	0.91174	724.122	1.32013	724.122	1.25225
702.66	0.00899	701.51	-0.0066	704.107	0.0107		702.527	0.00169	701.27	0.000465727	704.292	0.00903		682.507	0.94121	725.648	1.33998	725.648	1.27605
702.69	-0.00754	701.59	-0.02834	704.116	0.01084		702.557	0.00115	701.35	0.00133	704.301	0.0092		683.862	0.92535	727.18	1.35667	727.18	1.29192
702.72	-0.02159	701.67	-0.01586	704.125	0.01098		702.587	0.000972296	701.43	0.000322324	704.309	0.00935		685.223	0.96626	728.719	1.37131	728.719	1.31121
702.75	-0.01498	701.75	0.01694	704.134	0.01111		702.617	0.00202	701.51	0.000500475	704.318	0.00951		686.589	0.95217	730.264	1.38799	730.264	1.34133
702.78	-0.01076	701.83	0.01159	704.143	0.01123		702.647	0.00174	701.59	0.000749155	704.327	0.00965		687.96	0.96497
702.81	0.00379	701.91	-0.00622	704.152	0.01136		702.677	0.00238	701.67	0.000570559	704.335	0.00979		689.337	0.99754
702.84	0.00405	701.99	-0.00475	704.161	0.01147		702.707	0.00176	701.75	0.00153	704.344	0.00992		690.72	1.00246
702.87	-0.00375	702.07	0.00207	704.17	0.01159		702.737	0.00194	701.83	0.000656363	704.353	0.01005		692.108	1.00877
702.9	-0.00879	702.15	0.00408	704.179	0.0117		702.767	0.00211	701.91	0.00104	704.361	0.01017		693.501	1.03477
702.93	-0.00996	702.23	-0.02415	704.188	0.01181		702.797	0.00261	701.99	0.00144	704.37	0.01029		694.901	1.06338
702.96	-0.00779	702.31	0.00867	704.197	0.01191		702.827	0.00183	702.07	0.00133	704.378	0.0104		696.306	1.06229
702.99	0.000393319	702.39	-0.0141	704.206	0.01202		702.857	0.00188	702.15	0.00171	704.387	0.01051		697.716	1.06369
703.02	-0.02815	702.47	-0.00313	704.215	0.01212		702.887	0.00225	702.23	0.00156	704.396	0.01061		699.133	1.1082
703.05	0.0058	702.55	-0.00957	704.224	0.01222		702.917	0.00243	702.31	0.00138	704.404	0.01071		700.555	1.11906
703.08	-0.01317	702.63	-0.0152	704.233	0.01231		702.947	0.00152	702.39	0.000915349	704.413	0.01081		701.983	1.11039
703.11	-0.01554	702.71	0.0061	704.242	0.01241		702.977	0.00215	702.47	0.00225	704.422	0.0109		703.417	1.1369
703.14	0.00947	702.79	-0.01261	704.251	0.0125		703.007	0.00278	702.55	0.00177	704.43	0.01099		704.856	1.13375
703.17	0.00552	702.87	-0.00638	704.26	0.01259		703.037	0.00265	702.63	0.00264	704.439	0.01107		706.302	1.03799
703.2	0.000565332	702.95	0.01327	704.269	0.01268		703.067	0.00304	702.71	0.00174	704.448	0.01116		707.753	0.8913
703.23	0.0175	703.03	-0.00168	704.278	0.01277		703.097	0.00291	702.79	0.00215	704.456	0.01124		709.211	0.79648
703.26	0.00375	703.11	0.01912	704.287	0.01286		703.127	0.00226	702.87	0.00257	704.465	0.01132		710.674	0.82576
703.29	0.00511	703.19	0.00749	704.296	0.01294		703.157	0.00162	702.95	0.0012	704.474	0.0114		712.144	0.89724
703.32	-0.01432	703.27	0.01792	704.305	0.01303		703.187	0.00225	703.03	0.00198	704.482	0.01147		713.619	0.91511
703.35	-0.00322	703.35	-0.00833	704.314	0.01312		703.217	0.00259	703.11	0.00256	704.491	0.01155		715.101	0.98693
703.38	-0.00928	703.43	0.00548	704.323	0.0132		703.247	0.00174	703.19	0.00265	704.5	0.01162		716.589	1.03038
703.41	0.00329	703.51	0.01001	704.332	0.01329		703.277	0.00229	703.27	0.0032	704.508	0.0117		718.083	1.03095
703.44	-0.000740896	703.59	-0.01351	704.341	0.01337		703.307	0.00246	703.35	0.00329	704.517	0.01177		719.583	1.01425
703.47	-0.01669	703.67	-0.0088	704.35	0.01346		703.337	0.00242	703.43	0.00326	704.526	0.01184		721.09	0.96021
703.5	-0.0144	703.75	-0.02752	704.359	0.01355		703.367	0.0023	703.51	0.00355	704.534	0.01191		722.603	0.99006
703.53	0.02114	703.83	0.01391	704.368	0.01364		703.397	0.00397	703.59	0.00311	704.543	0.01198		724.122	1.02156
703.56	0.01571	703.91	0.00767	704.377	0.01373		703.427	0.0033	703.67	0.00404	704.552	0.01205		725.648	1.08233
703.59	0.01999	703.99	0.0259	704.386	0.01382		703.457	0.00328	703.75	0.00412	704.56	0.01212		727.18	1.13893
703.62	0.01609	704.07	-0.0257	704.395	0.01391		703.487	0.00305	703.83	0.00366	704.569	0.01219		728.719	1.19325
703.65	-0.00117	704.15	0.01098	704.404	0.01399		703.517	0.00304	703.91	0.00469	704.578	0.01226		730.264	1.2119
703.68	0.00812	704.23	-0.01651	704.413	0.01408		703.547	0.00297	703.99	0.00456	704.586	0.01234		731.816	1.23791
703.71	0.01527	704.31	0.01174	704.422	0.01417		703.577	0.00363	704.07	0.00487	704.595	0.01241		733.374	1.24305
703.74	0.00966	704.39	-0.0069	704.431	0.01427		703.607	0.00366	704.15	0.00595	704.604	0.01248		734.939	1.28424
703.77	-0.00311	704.47	0.01374	704.44	0.01436		703.637	0.00274	704.23	0.00675	704.612	0.01255		736.511	1.30494
703.8	0.01372	704.55	0.01118	704.449	0.01446		703.667	0.00373	704.31	0.00708	704.621	0.01262		738.089	1.32319
703.83	0.00269	704.63	0.02484	704.458	0.01455		703.697	0.00374	704.39	0.00667	704.63	0.0127		739.674	1.37741
703.86	0.00626	704.71	0.00391	704.467	0.01465		703.727	0.0038	704.47	0.00745	704.638	0.01277		741.266	1.38104
703.89	-0.0116	704.79	0.00519	704.476	0.01474		703.757	0.00383	704.55	0.00914	704.647	0.01284		742.865	1.38761
703.92	-0.01433	704.87	0.00343	704.485	0.01484		703.787	0.0045	704.63	0.00967	704.656	0.01292		744.471	1.37593
703.95	0.00141	704.95	-0.00677	704.494	0.01493		703.817	0.00415	704.71	0.01041	704.664	0.01299		746.084	1.39102
703.98	-0.0041	705.03	0.02126	704.503	0.01504		703.847	0.00463	704.79	0.01109	704.673	0.01307		747.703	1.39197
704.01	0.01888	705.11	0.01168	704.512	0.01514		703.877	0.00429	704.87	0.01233	704.682	0.01315		749.33	1.38958
704.04	-0.00367	705.19	0.02132	704.521	0.01524		703.907	0.00514	704.95	0.0127	704.69	0.01322		750.964	1.42149
704.07	0.00285	705.27	0.02241	704.53	0.01534		703.937	0.00428	705.03	0.01426	704.699	0.0133		752.605	1.43277
704.1	0.01319	705.35	0.04806	704.538	0.01544		703.967	0.00311	705.11	0.01546	704.707	0.01338		754.254	1.46272
704.13	0.0062	705.43	0.07194	704.547	0.01555		703.997	0.00427	705.19	0.01848	704.716	0.01346		755.909	1.45981
704.16	-0.0148	705.51	0.05465	704.556	0.01566		704.027	0.00496	705.27	0.02117	704.725	0.01354		757.572	1.51204
704.19	0.000908397	705.59	0.08246	704.565	0.01576		704.057	0.00441	705.35	0.02184	704.733	0.01362		759.242	1.54097
704.22	-0.00328	705.67	0.11971	704.574	0.01588		704.087	0.00464	705.43	0.0258	704.742	0.0137		760.919	1.53054
704.25	0.02421	705.75	0.13581	704.583	0.01599		704.117	0.00436	705.51	0.02944	704.751	0.01379		762.604	1.53435
704.28	0.01965	705.83	0.14336	704.592	0.0161		704.147	0.00559	705.59	0.03336	704.759	0.01387		764.297	1.54571
704.31	-0.00416	705.91	0.14701	704.601	0.01621		704.177	0.00517	705.67	0.04151	704.768	0.01395		765.996	1.59662
704.34	-0.00574	705.99	0.20164	704.61	0.01632		704.207	0.00569	705.75	0.05183	704.777	0.01404		767.704	1.5669
704.37	0.00677	706.07	0.21847	704.619	0.01644		704.237	0.00641	705.83	0.06697	704.785	0.01412		769.419	1.62342
704.4	-0.00393	706.15	0.26999	704.628	0.01656		704.267	0.00637	705.91	0.08748	704.794	0.01421		771.142	1.67969
704.43	0.0089	706.23	0.28366	704.637	0.01667		704.297	0.00612	705.99	0.11176	704.803	0.0143		772.872	1.68732
704.46	0.00902	706.31	0.27412	704.646	0.01679		704.327	0.00787	706.07	0.13354	704.811	0.01439		774.611	1.66556
704.49	0.02923	706.39	0.32512	704.655	0.01692		704.357	0.00742	706.15	0.15345	704.82	0.01448		776.357	1.6986
704.52	0.01805	706.47	0.35389	704.664	0.01704		704.387	0.00705	706.23	0.17559	704.829	0.01457		778.111	1.77327
704.55	0.01775	706.55	0.42287	704.673	0.01716		704.417	0.00714	706.31	0.2087	704.837	0.01466		779.873	1.7977
704.58	0.00559	706.63	0.4618	704.682	0.01729		704.447	0.00807	706.39	0.25511	704.846	0.01475		781.643	1.877
704.61	0.01838	706.71	0.50285	704.691	0.01742		704.477	0.00806	706.47	0.29295	704.855	0.01484
704.64	0.01842	706.79	0.59645	704.7	0.01755		704.507	0.00769	706.55	0.31882	704.863	0.01494
704.67	0.00849	706.87	0.55193	704.709	0.01768		704.537	0.00707	706.63	0.32047	704.872	0.01503
704.7	0.0155	706.95	0.52935	704.718	0.01781		704.567	0.00822	706.71	0.3045	704.881	0.01513
704.73	0.01149	707.03	0.51593	704.727	0.01794		704.597	0.00875	706.79	0.29306	704.889	0.01523
704.76	0.01079	707.11	0.53323	704.736	0.01808		704.627	0.00863	706.87	0.30114	704.898	0.01532
704.79	0.01395	707.19	0.59612	704.745	0.01822		704.657	0.00881	706.95	0.3234	704.907	0.01542
704.82	0.02712	707.27	0.63511	704.754	0.01836		704.687	0.00986	707.03	0.35346	704.915	0.01552
704.85	0.02496	707.35	0.71072	704.763	0.0185		704.717	0.00921	707.11	0.37623	704.924	0.01563
704.88	0.03343	707.43	0.72176	704.772	0.01864		704.747	0.0093	707.19	0.38964	704.933	0.01573
704.91	0.01674	707.51	0.8479	704.781	0.01879		704.777	0.01045	707.27	0.40774	704.941	0.01583
704.94	0.00671	707.59	0.86517	704.79	0.01893		704.807	0.01034	707.35	0.44946	704.95	0.01594
704.97	0.01018	707.67	0.96109	704.799	0.01908		704.837	0.01073	707.43	0.50704	704.959	0.01604
705	0.01563	707.75	1	704.808	0.01923		704.867	0.01128	707.51	0.57118	704.967	0.01615
705.03	0.02771	707.83	0.98952	704.817	0.01939		704.897	0.01054	707.59	0.62402	704.976	0.01626
705.06	0.02457	707.91	0.99595	704.826	0.01954		704.927	0.0121	707.67	0.65011	704.985	0.01637
705.09	0.01132	707.99	0.99409	704.835	0.0197		704.957	0.01233	707.75	0.6581	704.993	0.01648
705.12	0.02035	708.07	0.96428	704.844	0.01986		704.987	0.01297	707.83	0.66996	705.002	0.01659
705.15	0.01476	708.15	0.90834	704.853	0.02002		705.017	0.01342	707.91	0.7143	705.011	0.01671
705.18	0.03984	708.23	0.85378	704.862	0.02019		705.047	0.01388	707.99	0.78874	705.019	0.01682
705.21	0.0277	708.31	0.781	704.871	0.02036		705.077	0.01455	708.07	0.87496	705.028	0.01694
705.24	0.02113	708.39	0.7213	704.88	0.02053		705.107	0.01429	708.15	0.94471	705.036	0.01706
705.27	0.04305	708.47	0.63824	704.889	0.0207		705.137	0.01518	708.23	0.99035	705.045	0.01717
705.3	0.02675	708.55	0.63328	704.898	0.02087		705.167	0.01606	708.31	0.99924	705.054	0.01729
705.33	0.02555	708.63	0.60833	704.907	0.02105		705.197	0.01662	708.39	0.97698	705.062	0.01742
705.36	0.04564	708.71	0.55537	704.916	0.02123		705.227	0.01623	708.47	0.91839	705.071	0.01754
705.39	0.04493	708.79	0.54451	704.925	0.02141		705.257	0.01721	708.55	0.8268	705.08	0.01767
705.42	0.07288	708.87	0.42878	704.934	0.02159		705.287	0.01876	708.63	0.7168	705.088	0.01779
705.45	0.03949	708.95	0.40198	704.943	0.02178		705.317	0.01937	708.71	0.59181	705.097	0.01792
705.48	0.05213	709.03	0.34774	704.952	0.02197		705.347	0.02029	708.79	0.47922	705.106	0.01805
705.51	0.06567	709.11	0.32856	704.961	0.02217		705.377	0.02059	708.87	0.38371	705.114	0.01818
705.54	0.07997	709.19	0.28599	704.97	0.02237		705.407	0.0217	708.95	0.31074	705.123	0.01831
705.57	0.06503	709.27	0.26618	704.979	0.02257		705.437	0.02268	709.03	0.24802	705.132	0.01845
705.6	0.07888	709.35	0.27781	704.988	0.02277		705.467	0.02488	709.11	0.20099	705.14	0.01858
705.63	0.07585	709.43	0.21941	704.997	0.02298		705.497	0.02528	709.19	0.16639	705.149	0.01872
705.66	0.09703	709.51	0.23221	705.006	0.02319		705.527	0.02697	709.27	0.14522	705.158	0.01886
705.69	0.10069	709.59	0.20756	705.015	0.0234		705.557	0.02937	709.35	0.1298	705.166	0.019
705.72	0.0954	709.67	0.20593	705.024	0.02362		705.587	0.02889	709.43	0.11836	705.175	0.01915
705.75	0.10086	709.75	0.20267	705.033	0.02384		705.617	0.03164	709.51	0.11043	705.184	0.01929
705.78	0.11428	709.83	0.19992	705.042	0.02406		705.647	0.03499	709.59	0.10325	705.192	0.01944
705.81	0.11029	709.91	0.18652	705.051	0.02429		705.677	0.03729	709.67	0.10188	705.201	0.01959
705.84	0.13403	709.99	0.22022	705.06	0.02452		705.707	0.03977	709.75	0.10459	705.21	0.01974
705.87	0.08909	710.07	0.19704	705.069	0.02475		705.737	0.04307	709.83	0.11649	705.218	0.01989
705.9	0.1209	710.15	0.17014	705.078	0.02499		705.767	0.04617	709.91	0.13474	705.227	0.02005
705.93	0.14305	710.23	0.22026	705.087	0.02524		705.797	0.05086	709.99	0.15405	705.236	0.0202
705.96	0.14322	710.31	0.19161	705.096	0.02548		705.827	0.05554	710.07	0.17217	705.244	0.02036
705.99	0.16505	710.39	0.20213	705.105	0.02574		705.857	0.06169	710.15	0.18703	705.253	0.02052
706.02	0.15793	710.47	0.21941	705.114	0.026		705.887	0.06898	710.23	0.21262	705.262	0.02069
706.05	0.15228	710.55	0.20996	705.123	0.02626		705.917	0.07669	710.31	0.22024	705.27	0.02085
706.08	0.15406	710.63	0.2048	705.132	0.02653		705.947	0.08595	710.39	0.22254	705.279	0.02102
706.11	0.15617	710.71	0.17535	705.141	0.0268		705.977	0.09894	710.47	0.21806	705.288	0.02119
706.14	0.19946	710.79	0.16259	705.15	0.02707		706.007	0.11035	710.55	0.20655	705.296	0.02137
706.17	0.20027	710.87	0.18372	705.159	0.02736		706.037	0.12059	710.63	0.1854	705.305	0.02154
706.2	0.20359	710.95	0.16751	705.168	0.02764		706.067	0.1302	710.71	0.16495	705.314	0.02172
706.23	0.23364	711.03	0.15093	705.177	0.02794		706.097	0.14026	710.79	0.14182	705.322	0.0219
706.26	0.23273	711.11	0.16124	705.186	0.02823		706.127	0.14789	710.87	0.12296	705.331	0.02208
706.29	0.2374	711.19	0.11335	705.195	0.02854		706.157	0.15183	710.95	0.10624	705.34	0.02227
706.32	0.2495	711.27	0.10072	705.204	0.02885		706.187	0.15268	711.03	0.09508	705.348	0.02246
706.35	0.27941	711.35	0.11579	705.213	0.02917		706.217	0.15591	711.11	0.08832	705.357	0.02265
706.38	0.29049	711.43	0.115	705.222	0.02949		706.247	0.16065	711.19	0.08431	705.365	0.02284
706.41	0.25537	711.51	0.08807	705.231	0.02982		706.277	0.16326	711.27	0.07769	705.374	0.02304
706.44	0.28289	711.59	0.07671	705.24	0.03016		706.307	0.17084	711.35	0.07237	705.383	0.02324
706.47	0.29975	711.67	0.07576	705.249	0.0305		706.337	0.18325	711.43	0.06511	705.391	0.02345
706.5	0.2916	711.75	0.07131	705.258	0.03086		706.367	0.1996	711.51	0.06321	705.4	0.02365
706.53	0.30669	711.83	0.05957	705.267	0.03121		706.397	0.22136	711.59	0.06035	705.409	0.02386
706.56	0.31264	711.91	0.08586	705.276	0.03158		706.427	0.24993	711.67	0.06235	705.417	0.02408
706.59	0.35588	711.99	0.05271	705.285	0.03196		706.457	0.27734	711.75	0.0672	705.426	0.02429
706.62	0.39171	712.07	0.04878	705.294	0.03234		706.487	0.30474	711.83	0.07839	705.435	0.02451
706.65	0.40697	712.15	0.06214	705.303	0.03273		706.517	0.32719	711.91	0.09076	705.443	0.02474
706.68	0.40563	712.23	0.05793	705.312	0.03313		706.547	0.3404	711.99	0.09935	705.452	0.02497
706.71	0.48498	712.31	0.05275	705.321	0.03354		706.577	0.3461	712.07	0.10205	705.461	0.0252
706.74	0.50119	712.39	0.07387	705.33	0.03396		706.607	0.3405	712.15	0.09519	705.469	0.02543
706.77	0.53932	712.47	0.05857	705.339	0.0344		706.637	0.33056	712.23	0.08512	705.478	0.02567
706.8	0.54026	712.55	0.07074	705.348	0.03484		706.667	0.31537	712.31	0.07016	705.487	0.02591
706.83	0.54445	712.63	0.04696	705.357	0.03529		706.697	0.29395	712.39	0.0552	705.495	0.02616
706.86	0.54424	712.71	0.05959	705.366	0.03575		706.727	0.27735	712.47	0.04518	705.504	0.02641
706.89	0.57808	712.79	0.05512	705.375	0.03623		706.757	0.26342	712.55	0.03703	705.513	0.02667
706.92	0.57983	712.87	0.01817	705.384	0.03671		706.787	0.25452	712.63	0.03119	705.521	0.02693
706.95	0.59686	712.95	0.04404	705.393	0.03721		706.817	0.25179	712.71	0.02863	705.53	0.02719
706.98	0.62552	713.03	0.05855	705.402	0.03772		706.847	0.25092	712.79	0.02597	705.539	0.02746
707.01	0.59282	713.11	0.03535	705.411	0.03825		706.877	0.25809	712.87	0.02461	705.547	0.02774
707.04	0.58006	713.19	0.02303	705.42	0.03879		706.907	0.27094	712.95	0.02417	705.556	0.02802
707.07	0.59633	713.27	0.01116	705.429	0.03934		706.937	0.28305	713.03	0.02419	705.565	0.0283
707.1	0.58579	713.35	0.04542	705.438	0.03992		706.967	0.29896	713.11	0.02448	705.573	0.02859
707.13	0.63177	713.43	0.0248	705.447	0.0405		706.997	0.32118	713.19	0.02269	705.582	0.02889
707.16	0.66776	713.51	0.01633	705.456	0.0411		707.027	0.33998	713.27	0.02088	705.591	0.02919
707.19	0.60909	713.59	0.01903	705.465	0.04172		707.057	0.36075	713.35	0.01902	705.599	0.0295
707.22	0.60431	713.67	-0.00268	705.474	0.04236		707.087	0.37447	713.43	0.01675	705.608	0.02981
707.25	0.6652	713.75	0.0216	705.483	0.04301		707.117	0.38413	713.51	0.01505	705.617	0.03013
707.28	0.63864	713.83	-0.00578	705.492	0.04369		707.147	0.3879	713.59	0.01407	705.625	0.03046
707.31	0.67984	713.91	0.0433	705.5	0.04438		707.177	0.38604	713.67	0.01308	705.634	0.03079
707.34	0.64802	713.99	0.05872	705.51	0.0451		707.207	0.37916	713.75	0.01161	705.643	0.03113
707.37	0.71513	714.07	0.04549	705.518	0.04584		707.237	0.37593	713.83	0.01127	705.651	0.03147
707.4	0.7615	714.15	0.00506	705.527	0.0466		707.267	0.36921	713.91	0.0131	705.66	0.03183
707.43	0.71732	714.23	0.00653	705.536	0.04738		707.297	0.36762	713.99	0.01191	705.669	0.03219
707.46	0.76199	714.31	0.03825	705.545	0.04819		707.327	0.37452	714.07	0.01234	705.677	0.03255
707.49	0.77994	714.39	0.01097	705.554	0.04902		707.357	0.38441	714.15	0.01318	705.686	0.03293
707.52	0.82546	714.47	0.02773	705.563	0.04988		707.387	0.40451	714.23	0.01306	705.694	0.03331
707.55	0.86606	714.55	0.01158	705.572	0.05077		707.417	0.43139	714.31	0.01371	705.703	0.03371
707.58	0.90825	714.63	0.05209	705.581	0.05168		707.447	0.46852	714.39	0.01344	705.712	0.03411
707.61	0.90858	714.71	0.0073	705.59	0.05263		707.477	0.50823	714.47	0.013	705.72	0.03452
707.64	0.84605	714.79	0.02962	705.599	0.0536		707.507	0.54805	714.55	0.0119	705.729	0.03494
707.67	0.89376	714.87	0.03197	705.608	0.05461		707.537	0.58683	714.63	0.01154	705.738	0.03537
707.7	0.93131	714.95	0.00243	705.617	0.05565		707.567	0.62492	714.71	0.0095	705.746	0.03581
707.73	0.91517	715.03	0.0022	705.626	0.05673		707.597	0.65251	714.79	0.01051	705.755	0.03625
707.76	0.93744	715.11	0.02065	705.635	0.05784		707.627	0.66788	714.87	0.01041	705.764	0.03671
707.79	0.96856	715.19	0.0132	705.644	0.05898		707.657	0.66571	714.95	0.01005	705.772	0.03719
707.82	0.94789	715.27	-0.0066	705.653	0.06017		707.687	0.65482	715.03	0.00872	705.781	0.03767
707.85	0.92017	715.35	0.03832	705.662	0.06139		707.717	0.64457	715.11	0.00922	705.79	0.03816
707.88	0.93589	715.43	0.03881	705.671	0.06265		707.747	0.62809	715.19	0.0084	705.798	0.03867
707.91	1	715.51	0.03756	705.68	0.06395		707.777	0.61484	715.27	0.00804	705.807	0.03919
707.94	0.95281	715.59	0.0411	705.689	0.0653		707.807	0.60593	715.35	0.00776	705.816	0.03972
707.97	0.92726	715.67	0.04905	705.698	0.06669		707.837	0.60694	715.43	0.00694	705.824	0.04027
708	0.91188	715.75	0.02838	705.707	0.06812		707.867	0.61075	715.51	0.00681	705.833	0.04083
708.03	0.92072	715.83	0.02018	705.716	0.0696		707.897	0.62434	715.59	0.00672	705.842	0.04141
708.06	0.90654	715.91	0.02343	705.725	0.07112		707.927	0.64368	715.67	0.00599	705.85	0.042
708.09	0.9255	715.99	0.0182	705.734	0.07269		707.957	0.67855	715.75	0.00636	705.859	0.04261
708.12	0.91844	716.07	0.02735	705.743	0.07431		707.987	0.72225	715.83	0.00558	705.868	0.04324
708.15	0.89938	716.15	0.03788	705.752	0.07598		708.017	0.77252	715.91	0.00639	705.876	0.04388
708.18	0.90906	716.23	0.03022	705.761	0.0777		708.047	0.82701	715.99	0.00641	705.885	0.04454
708.21	0.89802	716.31	0.02301	705.77	0.07947		708.077	0.88106	716.07	0.00641	705.894	0.04522
708.24	0.80889	716.39	0.03165	705.779	0.08129		708.107	0.93293	716.15	0.00621	705.902	0.04592
708.27	0.88113	716.47	0.01135	705.788	0.08317		708.137	0.96764	716.23	0.00506	705.911	0.04665
708.3	0.83081	716.55	0.02148	705.797	0.0851		708.167	0.99238	716.31	0.00495	705.92	0.04739
708.33	0.83672	716.63	0.02811	705.806	0.08708		708.197	0.99819	716.39	0.00575	705.928	0.04816
708.36	0.76302	716.71	0.03704	705.815	0.08911		708.227	0.99663	716.47	0.00548	705.937	0.04895
708.39	0.76897	716.79	0.01836	705.824	0.0912		708.257	0.98981	716.55	0.00581	705.946	0.04976
708.42	0.76659	716.87	0.05914	705.833	0.09334		708.287	0.98355	716.63	0.00456	705.954	0.0506
708.45	0.70847	716.95	0.0304	705.842	0.09554		708.317	0.97705	716.71	0.00655	705.963	0.05147
708.48	0.70854	717.03	0.05677	705.851	0.09779		708.347	0.9798	716.79	0.00618	705.972	0.05237
708.51	0.69682	717.11	0.04613	705.86	0.1001		708.377	0.98227	716.87	0.00691	705.98	0.05329
708.54	0.64938	717.19	0.02445	705.869	0.10247		708.407	0.98732	716.95	0.00651	705.989	0.05425
708.57	0.6166	717.27	0.01666	705.878	0.10489		708.437	0.9874	717.03	0.00688	705.998	0.05524
708.6	0.5843	717.35	0.04055	705.887	0.10736		708.467	0.97973	717.11	0.00662	706.006	0.05626
708.63	0.61524	717.43	0.03364	705.896	0.1099		708.497	0.9558	717.19	0.00552	706.015	0.05732
708.66	0.55838	717.51	0.03644	705.905	0.11248		708.527	0.92169	717.27	0.00649	706.024	0.05841
708.69	0.54809	717.59	0.01813	705.914	0.11512		708.557	0.86789	717.35	0.00573	706.032	0.05955
708.72	0.52454	717.67	0.06682	705.923	0.11782		708.587	0.80739	717.43	0.00534	706.041	0.06072
708.75	0.51527	717.75	0.06395	705.932	0.12058		708.617	0.73994	717.51	0.00629	706.049	0.06194
708.78	0.4821	717.83	0.04157	705.941	0.12338		708.647	0.67237	717.59	0.00653	706.058	0.06319
708.81	0.46477	717.91	0.03997	705.95	0.12625		708.677	0.61061	717.67	0.00706	706.067	0.0645
708.84	0.46121	717.99	0.04193	705.959	0.12916		708.707	0.55645	717.75	0.00827	706.075	0.06585
708.87	0.43472	718.07	0.0672	705.968	0.13214		708.737	0.51023	717.83	0.00818	706.084	0.06725
708.9	0.41122	718.15	0.07152	705.977	0.13517		708.767	0.46744	717.91	0.00708	706.093	0.0687
708.93	0.45008	718.23	0.04418	705.986	0.13825		708.797	0.43566	717.99	0.00793	706.101	0.07021
708.96	0.36755	718.31	0.03464	705.995	0.14139		708.827	0.40721	718.07	0.0082	706.11	0.07177
708.99	0.37303	718.39	0.05316	706.004	0.14459		708.857	0.37808	718.15	0.00868	706.119	0.07338
709.02	0.39285	718.47	0.08348	706.013	0.14785		708.887	0.35298	718.23	0.00884	706.127	0.07506
709.05	0.37592	718.55	0.05252	706.022	0.15116		708.917	0.32399	718.31	0.0079	706.136	0.0768
709.08	0.35284	718.63	0.02156	706.031	0.15453		708.947	0.29749	718.39	0.00867	706.145	0.0786
709.11	0.38021	718.71	0.04178	706.04	0.15796		708.977	0.2726	718.47	0.00896	706.153	0.08047
709.14	0.33386	718.79	0.07818	706.049	0.16145		709.007	0.24836	718.55	0.01007	706.162	0.0824
709.17	0.30139	718.87	0.10137	706.058	0.165		709.037	0.22469	718.63	0.0108	706.171	0.0844
709.2	0.30834	718.95	0.08416	706.067	0.16861		709.067	0.2041	718.71	0.01206	706.179	0.08648
709.23	0.29668	719.03	0.12612	706.076	0.17229		709.097	0.18777	718.79	0.01359	706.188	0.08863
709.26	0.28946	719.11	0.13521	706.085	0.17602		709.127	0.17471	718.87	0.0146	706.197	0.09085
709.29	0.28146	719.19	0.1063	706.094	0.17982		709.157	0.1605	718.95	0.01683	706.205	0.09315
709.32	0.30746	719.27	0.13436	706.103	0.18369		709.187	0.14995	719.03	0.02036	706.214	0.09552
709.35	0.28608	719.35	0.17599	706.112	0.18762		709.217	0.14078	719.11	0.02455	706.223	0.09798
709.38	0.25463	719.43	0.13242	706.121	0.19162		709.247	0.13445	719.19	0.0319	706.231	0.10051
709.41	0.25814	719.51	0.14704	706.13	0.19569		709.277	0.12847	719.27	0.04109	706.24	0.10312
709.44	0.27493	719.59	0.13199	706.139	0.19982		709.307	0.12545	719.35	0.05146	706.249	0.10581
709.47	0.27201	719.67	0.15855	706.148	0.20402		709.337	0.12074	719.43	0.066	706.257	0.10859
709.5	0.2278	719.75	0.18839	706.157	0.20829		709.367	0.11809	719.51	0.08134	706.266	0.11144
709.53	0.26059	719.83	0.18383	706.166	0.21263		709.397	0.11379	719.59	0.09888	706.275	0.11438
709.56	0.23077	719.91	0.196	706.175	0.21703		709.427	0.1117	719.67	0.11477	706.283	0.11739
709.59	0.25671	719.99	0.22823	706.184	0.2215		709.457	0.10935	719.75	0.12548	706.292	0.12048
709.62	0.25182	720.07	0.2127	706.193	0.22604		709.487	0.1079	719.83	0.12915	706.301	0.12364
709.65	0.25175	720.15	0.23029	706.202	0.23064		709.517	0.10491	719.91	0.12415	706.309	0.12688
709.68	0.23752	720.23	0.21204	706.211	0.23531		709.547	0.10121	719.99	0.1126	706.318	0.1302
709.71	0.2503	720.31	0.20949	706.22	0.24003		709.577	0.09864	720.07	0.09913	706.327	0.13358
709.74	0.23565	720.39	0.18374	706.229	0.2448		709.607	0.0948	720.15	0.09388	706.335	0.13702
709.77	0.23325	720.47	0.24203	706.238	0.24963		709.637	0.09324	720.23	0.09701	706.344	0.14053
709.8	0.21078	720.55	0.24151	706.247	0.25451		709.667	0.09021	720.31	0.11327	706.353	0.14409
709.83	0.2274	720.63	0.27209	706.256	0.25943		709.697	0.08809	720.39	0.13314	706.361	0.14771
709.86	0.22847	720.71	0.25391	706.265	0.26439		709.727	0.0897	720.47	0.15592	706.37	0.15137
709.89	0.24617	720.79	0.24207	706.274	0.26938		709.757	0.09119	720.55	0.17887	706.378	0.15508
709.92	0.22961	720.87	0.2846	706.283	0.2744		709.787	0.09378	720.63	0.19943	706.387	0.15882
709.95	0.23939	720.95	0.26097	706.292	0.27943		709.817	0.09706	720.71	0.22493	706.396	0.16259
709.98	0.22454	721.03	0.31071	706.301	0.28447		709.847	0.10286	720.79	0.24112	706.404	0.16638
710.01	0.22312	721.11	0.26992	706.31	0.28952		709.877	0.10964	720.87	0.2488	706.413	0.17019
710.04	0.24718	721.19	0.26162	706.319	0.29455		709.907	0.11542	720.95	0.25553	706.422	0.17401
710.07	0.25788	721.27	0.28628	706.328	0.29958		709.937	0.12298	721.03	0.25443	706.43	0.17783
710.1	0.24265	721.35	0.23295	706.337	0.30457		709.967	0.13313	721.11	0.23998	706.439	0.18164
710.13	0.22652	721.43	0.20945	706.346	0.30954		709.997	0.14157	721.19	0.21379	706.448	0.18544
710.16	0.2463	721.51	0.20427	706.355	0.31445		710.027	0.15035	721.27	0.18327	706.456	0.18922
710.19	0.22409	721.59	0.15873	706.364	0.31932		710.057	0.15842	721.35	0.15298	706.465	0.19296
710.22	0.20904	721.67	0.18398	706.373	0.32411		710.087	0.16497	721.43	0.12337	706.474	0.19667
710.25	0.21375	721.75	0.14035	706.382	0.32884		710.117	0.17145	721.51	0.10571	706.482	0.20034
710.28	0.22465	721.83	0.17679	706.391	0.33347		710.147	0.17423	721.59	0.09589	706.491	0.20395
710.31	0.22919	721.91	0.17729	706.4	0.33801		710.177	0.1793	721.67	0.09338	706.5	0.2075
710.34	0.24356	721.99	0.13277	706.409	0.34245		710.207	0.18225	721.75	0.09425	706.508	0.21099
710.37	0.22663	722.07	0.13345	706.418	0.34677		710.237	0.18471	721.83	0.09243	706.517	0.21441
710.4	0.20641	722.15	0.14573	706.427	0.35097		710.267	0.18846	721.91	0.08817	706.526	0.21775
710.43	0.21453	722.23	0.11102	706.436	0.35503		710.297	0.19262	721.99	0.08096	706.534	0.22101
710.46	0.21855	722.31	0.12579	706.445	0.35896		710.327	0.19456	722.07	0.07065	706.543	0.22417
710.49	0.20368	722.39	0.12749	706.454	0.36274		710.357	0.19816	722.15	0.06248	706.552	0.22725
710.52	0.23918	722.47	0.12644	706.463	0.36636		710.387	0.19966	722.23	0.05588	706.56	0.23024
710.55	0.23524	722.55	0.17831	706.471	0.36983		710.417	0.20511	722.31	0.05006	706.569	0.23313
710.58	0.22387	722.63	0.12555	706.48	0.37313		710.447	0.20496	722.39	0.04834	706.578	0.23592
710.61	0.21346	722.71	0.14201	706.489	0.37627		710.477	0.20486	722.47	0.04842	706.586	0.23861
710.64	0.21161	722.79	0.125	706.498	0.37923		710.507	0.20193	722.55	0.04916	706.595	0.2412
710.67	0.21157	722.87	0.14745	706.507	0.38202		710.537	0.19785	722.63	0.05087	706.604	0.24369
710.7	0.19881	722.95	0.12843	706.516	0.38464		710.567	0.18977	722.71	0.0539	706.612	0.24608
710.73	0.2313	723.03	0.13752	706.525	0.38708		710.597	0.1826	722.79	0.05564	706.621	0.24838
710.76	0.21405	723.11	0.11288	706.534	0.38934		710.627	0.173	722.87	0.05818	706.63	0.25059
710.79	0.19631	723.19	0.12552	706.543	0.39144		710.657	0.16354	722.95	0.06303	706.638	0.25271
710.82	0.21602	723.27	0.12719	706.552	0.39337		710.687	0.15248	723.03	0.06837	706.647	0.25474
710.85	0.20376	723.35	0.12177	706.561	0.39512		710.717	0.14473	723.11	0.07374	706.656	0.25669
710.88	0.22489	723.43	0.13877	706.57	0.39672		710.747	0.13707	723.19	0.07665	706.664	0.25857
710.91	0.20301	723.51	0.12803	706.579	0.39816		710.777	0.12718	723.27	0.07673	706.673	0.26037
710.94	0.18197	723.59	0.10193	706.588	0.39945		710.807	0.1216	723.35	0.07345	706.682	0.26212
710.97	0.17967	723.67	0.14971	706.597	0.40059		710.837	0.11443	723.43	0.07007	706.69	0.2638
711	0.20308	723.75	0.12694	706.606	0.40159		710.867	0.10964	723.51	0.06463	706.699	0.26544
711.03	0.15502	723.83	0.11032	706.615	0.40246		710.897	0.10215	723.59	0.0596	706.707	0.26703
711.06	0.13953	723.91	0.11821	706.624	0.4032		710.927	0.09584	723.67	0.05404	706.716	0.26858
711.09	0.15703	723.99	0.11269	706.633	0.40383		710.957	0.08952	723.75	0.04999	706.725	0.27009
711.12	0.14708	724.07	0.12087	706.642	0.40434		710.987	0.08643	723.83	0.0481	706.733	0.27159
711.15	0.15034	724.15	0.12174	706.651	0.40476		711.017	0.08391	723.91	0.04942	706.742	0.27306
711.18	0.14897	724.23	0.10379	706.66	0.40508		711.047	0.08048	723.99	0.05399	706.751	0.27451
711.21	0.17047	724.31	0.10734	706.669	0.40531		711.077	0.077	724.07	0.05731	706.759	0.27596
711.24	0.1715	724.39	0.1103	706.678	0.40547		711.107	0.07502	724.15	0.06083	706.768	0.2774
711.27	0.14258	724.47	0.07784	706.687	0.40555		711.137	0.0747	724.23	0.06316	706.777	0.27884
711.3	0.14536	724.55	0.07982	706.696	0.40557		711.167	0.07239	724.31	0.06055	706.785	0.28027
711.33	0.13101	724.63	0.0712	706.705	0.40554		711.197	0.07128	724.39	0.05878	706.794	0.28172
711.36	0.13814	724.71	0.09056	706.714	0.40545		711.227	0.07009	724.47	0.05707	706.803	0.28317
711.39	0.11722	724.79	0.07136	706.723	0.40533		711.257	0.07104	724.55	0.0554	706.811	0.28462
711.42	0.12078	724.87	0.07326	706.732	0.40516		711.287	0.06938	724.63	0.05559	706.82	0.28608
711.45	0.12124	724.95	0.11814	706.741	0.40496		711.317	0.06803	724.71	0.0571	706.829	0.28755
711.48	0.11865	725.03	0.09708	706.75	0.40473		711.347	0.06804	724.79	0.05793	706.837	0.28903
711.51	0.13738	725.11	0.09458	706.759	0.40449		711.377	0.06591	724.87	0.05691	706.846	0.2905
711.54	0.12476	725.19	0.07611	706.768	0.40422		711.407	0.06416	724.95	0.05514	706.855	0.29198
711.57	0.12983	725.27	0.06303	706.777	0.40394		711.437	0.06196	725.03	0.05315	706.863	0.29346
711.6	0.10004	725.35	0.07436	706.786	0.40365		711.467	0.05913	725.11	0.05131	706.872	0.29494
711.63	0.11421	725.43	0.1122	706.795	0.40335		711.497	0.05638	725.19	0.05072	706.881	0.2964
711.66	0.11241	725.51	0.10446	706.804	0.40304		711.527	0.05535	725.27	0.0497	706.889	0.29785
711.69	0.11361	725.59	0.07796	706.813	0.40273		711.557	0.05414	725.35	0.05152	706.898	0.29929
711.72	0.10659	725.67	0.08736	706.822	0.40242		711.587	0.05358	725.43	0.05232	706.907	0.3007
711.75	0.1029	725.75	0.10086	706.831	0.40211		711.617	0.05091	725.51	0.05473	706.915	0.30208
711.78	0.11353	725.83	0.10264	706.84	0.4018		711.647	0.05105	725.59	0.05412	706.924	0.30343
711.81	0.0872	725.91	0.1132	706.849	0.40149		711.677	0.05468	725.67	0.05294	706.933	0.30475
711.84	0.11266	725.99	0.06651	706.858	0.40119		711.707	0.05346	725.75	0.05321	706.941	0.30602
711.87	0.09076	726.07	0.12114	706.867	0.4009		711.737	0.05669	725.83	0.05152	706.95	0.30724
711.9	0.10162	726.15	0.112	706.876	0.40062		711.767	0.06015	725.91	0.04932	706.959	0.30842
711.93	0.09045	726.23	0.09017	706.885	0.40034		711.797	0.06326	725.99	0.04634	706.967	0.30954
711.96	0.09727	726.31	0.08906	706.894	0.40008		711.827	0.06659	726.07	0.04484	706.976	0.3106
711.99	0.08543	726.39	0.08895	706.903	0.39982		711.857	0.07134	726.15	0.0445	706.985	0.3116
712.02	0.08567	726.47	0.07559	706.912	0.39959		711.887	0.07509	726.23	0.04396	706.993	0.31255
712.05	0.07655	726.55	0.07607	706.921	0.39937		711.917	0.08179	726.31	0.04506	707.002	0.31343
712.08	0.08728	726.63	0.10289	706.93	0.39917		711.947	0.08717	726.39	0.04684	707.011	0.31425
712.11	0.09923	726.71	0.07721	706.939	0.39899		711.977	0.09175	726.47	0.04633	707.019	0.31501
712.14	0.07816	726.79	0.08854	706.948	0.39883		712.007	0.0962	726.55	0.04706	707.028	0.31571
712.17	0.06299	726.87	0.07923	706.957	0.39871		712.037	0.10122	726.63	0.04615	707.036	0.31636
712.2	0.08401	726.95	0.10374	706.966	0.39861		712.067	0.10449	726.71	0.0455	707.045	0.31696
712.23	0.07196	727.03	0.08639	706.975	0.39854		712.097	0.10339	726.79	0.04172	707.054	0.31751
712.26	0.07355	727.11	0.08984	706.984	0.39852		712.127	0.10258	726.87	0.04032	707.062	0.31802
712.29	0.07635	727.19	0.10053	706.993	0.39853		712.157	0.09875	726.95	0.04091	707.071	0.3185
712.32	0.08652	727.27	0.10105	707.002	0.39858		712.187	0.09302	727.03	0.04383	707.08	0.31895
712.35	0.05568	727.35	0.11164	707.011	0.39869		712.217	0.08675	727.11	0.04863	707.088	0.31939
712.38	0.06557	727.43	0.10234	707.02	0.39885		712.247	0.0779	727.19	0.05226	707.097	0.31982
712.41	0.07897	727.51	0.08732	707.029	0.39908		712.277	0.07226	727.27	0.05606	707.106	0.32026
712.44	0.06515	727.59	0.09606	707.038	0.39936		712.307	0.06498	727.35	0.05592	707.114	0.32072
712.47	0.04296	727.67	0.09815	707.047	0.39971		712.337	0.05888	727.43	0.05436	707.123	0.3212
712.5	0.06233	727.75	0.07073	707.056	0.40014		712.367	0.05541	727.51	0.05157	707.132	0.32173
712.53	0.06635	727.83	0.10314	707.065	0.40065		712.397	0.05005	727.59	0.04967	707.14	0.32231
712.56	0.06147	727.91	0.10823	707.074	0.40124		712.427	0.04472	727.67	0.04728	707.149	0.32296
712.59	0.05495	727.99	0.09074	707.083	0.40193		712.457	0.041	727.75	0.04573	707.158	0.32369
712.62	0.04048	728.07	0.07255	707.092	0.40271		712.487	0.03829	727.83	0.04556	707.166	0.32452
712.65	0.04477	728.15	0.11379	707.101	0.4036		712.517	0.03684	727.91	0.04498	707.175	0.32546
712.68	0.05476	728.23	0.11601	707.11	0.40459		712.547	0.03354	727.99	0.0467	707.184	0.32653
712.71	0.06138	728.31	0.10676	707.119	0.4057		712.577	0.03136	728.07	0.04817	707.192	0.32774
712.74	0.03452	728.39	0.08242	707.128	0.40694		712.607	0.03067	728.15	0.05032	707.201	0.3291
712.77	0.04677	728.47	0.08077	707.137	0.4083		712.637	0.02826	728.23	0.05323	707.21	0.33063
712.8	0.05976	728.55	0.08706	707.146	0.4098		712.667	0.0261	728.31	0.05844	707.218	0.33235
712.83	0.04138	728.63	0.10661	707.155	0.41144		712.697	0.02547	728.39	0.06404	707.227	0.33426
712.86	0.05926	728.71	0.06999	707.164	0.41323		712.727	0.02445	728.47	0.06557	707.236	0.33639
712.89	0.05696	728.79	0.10893	707.173	0.41517		712.757	0.02408	728.55	0.06649	707.244	0.33873
712.92	0.05478	728.87	0.14425	707.182	0.41727		712.787	0.02257	728.63	0.06649	707.253	0.34131
712.95	0.04015	728.95	0.1247	707.191	0.41954		712.817	0.02087	728.71	0.06561	707.262	0.34413
712.98	0.04773	729.03	0.10359	707.2	0.42198		712.847	0.02067	728.79	0.06306	707.27	0.34721
713.01	0.04506	729.11	0.13716	707.209	0.4246		712.877	0.0204	728.87	0.06133	707.279	0.35055
713.04	0.07586	729.19	0.13508	707.218	0.4274		712.907	0.02033	728.95	0.06035	707.288	0.35417
713.07	0.04992	729.27	0.09545	707.227	0.43039		712.937	0.0201	729.03	0.06062	707.296	0.35806
713.1	0.04125	729.35	0.07202	707.236	0.43358		712.967	0.02051	729.11	0.0608	707.305	0.36223
713.13	0.04168	729.43	0.13527	707.245	0.43698		712.997	0.0202	729.19	0.06062	707.314	0.3667
713.16	0.05989	729.51	0.11741	707.254	0.44058		713.027	0.0203	729.27	0.06023	707.322	0.37145
713.19	0.04675	729.59	0.09427	707.263	0.44439		713.057	0.0208	729.35	0.05935	707.331	0.37651
713.22	0.05629	729.67	0.11793	707.272	0.44842		713.087	0.02179	729.43	0.05929	707.34	0.38185
713.25	0.04465	729.75	0.08698	707.281	0.45267		713.117	0.02147	729.51	0.05618	707.348	0.38749
713.28	0.05751	729.83	0.10274	707.29	0.45714		713.147	0.02177	729.59	0.05352	707.357	0.39343
713.31	0.06783	729.91	0.11834	707.299	0.46185		713.177	0.02176	729.67	0.0481	707.365	0.39965
713.34	0.03959	729.99	0.12199	707.308	0.46679		713.207	0.02219	729.75	0.04681	707.374	0.40615
713.37	0.03778	730.07	0.11193	707.317	0.47196		713.237	0.02118	729.83	0.0479	707.383	0.41294
713.4	0.03437	730.15	0.1128	707.326	0.47738		713.267	0.02011			707.391	0.41999
713.43	0.04309			707.335	0.48303		713.297	0.01885			707.4	0.42731
713.46	0.05624			707.344	0.48894		713.327	0.0178			707.409	0.43488
713.49	0.03102			707.353	0.49508		713.357	0.01698			707.417	0.44268
713.52	0.03389			707.362	0.50147		713.387	0.01598			707.426	0.45072
713.55	0.04407			707.371	0.50812		713.417	0.01528			707.435	0.45896
713.58	0.03348			707.38	0.515		713.447	0.01503			707.443	0.4674
713.61	0.03783			707.389	0.52214		713.477	0.01357			707.452	0.47602
713.64	0.01083			707.398	0.52952		713.507	0.01358			707.461	0.4848
713.67	0.02901			707.407	0.53714		713.537	0.01309			707.469	0.49373
713.7	0.01518			707.416	0.54501		713.567	0.0128			707.478	0.50278
713.73	0.03286			707.425	0.55311		713.597	0.01208			707.487	0.51194
713.76	0.02457			707.433	0.56145		713.627	0.01213			707.495	0.52118
713.79	0.04419			707.442	0.57001		713.657	0.01103			707.504	0.53048
713.82	0.02834			707.451	0.5788		713.687	0.0107			707.513	0.53983
713.85	0.03274			707.46	0.58781		713.717	0.01043			707.521	0.54919
713.88	0.01249			707.469	0.59703		713.747	0.00982			707.53	0.55856
713.91	0.03193			707.478	0.60645		713.777	0.01048			707.539	0.56791
713.94	0.0264			707.487	0.61607		713.807	0.00997			707.547	0.57721
713.97	0.03382			707.496	0.62587		713.837	0.01195			707.556	0.58645
714	0.02585			707.505	0.63585		713.867	0.01134			707.565	0.59561
714.03	0.04134			707.514	0.64599		713.897	0.01083			707.573	0.60467
714.06	0.02183			707.523	0.65629		713.927	0.00986			707.582	0.61361
714.09	0.02094			707.532	0.66673		713.957	0.01074			707.591	0.62242
714.12	0.00841			707.541	0.67729		713.987	0.01052			707.599	0.63109
714.15	0.01774			707.55	0.68797		714.017	0.01111			707.608	0.63959
714.18	0.00951			707.559	0.69875		714.047	0.01039			707.617	0.64791
714.21	0.02081			707.568	0.7096		714.077	0.01171			707.625	0.65605
714.24	0.01205			707.577	0.72053		714.107	0.0109			707.634	0.664
714.27	0.02625			707.586	0.73151		714.137	0.01036			707.643	0.67176
714.3	0.0277			707.595	0.74253		714.167	0.01103			707.651	0.6793
714.33	0.02891			707.604	0.75356		714.197	0.01119			707.66	0.68664
714.36	0.02577			707.613	0.76458		714.227	0.01105			707.669	0.69378
714.39	0.02017			707.622	0.77559		714.257	0.01153			707.677	0.7007
714.42	0.04427			707.631	0.78656		714.287	0.01113			707.686	0.70742
714.45	0.02128			707.64	0.79746		714.317	0.01213			707.694	0.71395
714.48	0.01594			707.649	0.80829		714.347	0.01257			707.703	0.72028
714.51	0.02628			707.658	0.81902		714.377	0.01229			707.712	0.72643
714.54	0.02437			707.667	0.82963		714.407	0.01107			707.72	0.73241
714.57	0.02731			707.676	0.8401		714.437	0.01032			707.729	0.73822
714.6	0.00867			707.685	0.8504		714.467	0.01111			707.738	0.74389
714.63	0.0217			707.694	0.86053		714.497	0.01007			707.746	0.74942
714.66	0.01002			707.703	0.87045		714.527	0.01057			707.755	0.75484
714.69	0.02019			707.712	0.88015		714.557	0.00915			707.764	0.76015
714.72	0.0105			707.721	0.88961		714.587	0.00881			707.772	0.76537
714.75	0.01637			707.73	0.8988		714.617	0.00948			707.781	0.77052
714.78	0.0205			707.739	0.9077		714.647	0.00953			707.79	0.77563
714.81	0.02407			707.748	0.9163		714.677	0.00887			707.798	0.78069
714.84	0.03858			707.757	0.92458		714.707	0.00981			707.807	0.78574
714.87	0.00115			707.766	0.93251		714.737	0.00903			707.816	0.79079
714.9	0.00516			707.775	0.94008		714.767	0.009			707.824	0.79585
714.93	0.01979			707.784	0.94727		714.797	0.00821			707.833	0.80094
714.96	0.00801			707.793	0.95406		714.827	0.00795			707.842	0.80608
714.99	-0.01502			707.802	0.96043		714.857	0.00851			707.85	0.81128
715.02	0.01975			707.811	0.96637		714.887	0.00833			707.859	0.81654
715.05	0.01789			707.82	0.97187		714.917	0.00921			707.868	0.82188
715.08	0.01142			707.829	0.97691		714.947	0.00779			707.876	0.8273
715.11	0.02562			707.838	0.98147		714.977	0.00818			707.885	0.83281
715.14	0.02609			707.847	0.98556		715.007	0.00781			707.894	0.83842
715.17	0.01653			707.856	0.98915		715.037	0.00652			707.902	0.84413
715.2	0.0232			707.865	0.99224		715.067	0.00845			707.911	0.84994
715.23	0.01205			707.874	0.99482		715.097	0.0079			707.92	0.85584
715.26	0.01403			707.883	0.99689		715.127	0.00718			707.928	0.86182
715.29	0.00932			707.892	0.99844		715.157	0.0067			707.937	0.86789
715.32	0.00906			707.901	0.99948		715.187	0.00606			707.946	0.87403
715.35	0.01361			707.91	1		715.217	0.00576			707.954	0.88023
715.38	0.00444			707.919	1		715.247	0.00687			707.963	0.88648
715.41	0.00987			707.928	0.99949		715.277	0.00652			707.972	0.89277
715.44	0.01517			707.937	0.99848		715.307	0.00602			707.98	0.89906
715.47	0.00216			707.946	0.99698		715.337	0.00517			707.989	0.90536
715.5	0.02376			707.955	0.99499		715.367	0.00615			707.998	0.91162
715.53	0.01798			707.964	0.99252		715.397	0.00583			708.006	0.91785
715.56	-0.00625			707.973	0.9896		715.427	0.006			708.015	0.924
715.59	0.01645			707.982	0.98623		715.457	0.0064			708.024	0.93006
715.62	0.00922			707.991	0.98244		715.487	0.00584			708.032	0.93601
715.65	0.03804			708	0.97823		715.517	0.00571			708.041	0.94182
715.68	0.01075			708.009	0.97364		715.547	0.00514			708.049	0.94746
715.71	-0.01046			708.018	0.96869		715.577	0.00549			708.058	0.95291
715.74	0.01846			708.027	0.96338		715.607	0.00377			708.067	0.95816
715.77	-0.00361			708.036	0.95776		715.637	0.00478			708.075	0.96317
715.8	0.01397			708.045	0.95185		715.667	0.00456			708.084	0.96793
715.83	0.00695			708.054	0.94566		715.697	0.00393			708.093	0.97241
715.86	0.00499			708.063	0.93922		715.727	0.00422			708.101	0.97659
715.89	0.00126			708.072	0.93256		715.757	0.00537			708.11	0.98047
715.92	0.01506			708.081	0.9257		715.787	0.0044			708.119	0.98402
715.95	0.01147			708.09	0.91867		715.817	0.00384			708.127	0.98723
715.98	0.0225			708.099	0.9115		715.847	0.0041			708.136	0.99009
716.01	0.03306			708.108	0.90419		715.877	0.00469			708.145	0.9926
716.04	0.01278			708.117	0.89679		715.907	0.00543			708.153	0.99474
716.07	0.01479			708.126	0.88931		715.937	0.00441			708.162	0.99652
716.1	-0.0107			708.135	0.88176		715.957	0.00529			708.171	0.99793
716.13	0.01118			708.144	0.87418						708.179	0.99897
716.15	0.00815			708.153	0.86657						708.188	0.99966
				708.162	0.85896						708.197	1
				708.171	0.85135						708.205	1
				708.18	0.84377						708.214	0.99966
				708.189	0.83623						708.223	0.99901
				708.198	0.82873						708.231	0.99807
				708.207	0.82128						708.24	0.99684
				708.216	0.8139						708.249	0.99536
				708.225	0.80659						708.257	0.99364
				708.234	0.79934						708.266	0.99171
				708.243	0.79218						708.275	0.98959
				708.252	0.78509						708.283	0.9873
				708.261	0.77809						708.292	0.98488
				708.27	0.77116						708.301	0.98236
				708.279	0.76432						708.309	0.97975
				708.288	0.75755						708.318	0.97708
				708.297	0.75086						708.327	0.97438
				708.306	0.74424						708.335	0.97169
				708.315	0.73769						708.344	0.96901
				708.324	0.73121						708.353	0.96638
				708.333	0.7248						708.361	0.96381
				708.342	0.71844						708.37	0.96134
				708.351	0.71214						708.378	0.95897
				708.36	0.7059						708.387	0.95674
				708.369	0.6997						708.396	0.95464
				708.378	0.69355						708.404	0.9527
				708.387	0.68745						708.413	0.95093
				708.395	0.68138						708.422	0.94934
				708.404	0.67536						708.43	0.94793
				708.413	0.66937						708.439	0.9467
				708.422	0.66341						708.448	0.94566
				708.431	0.65749						708.456	0.94481
				708.44	0.6516						708.465	0.94413
				708.449	0.64575						708.474	0.94362
				708.458	0.63993						708.482	0.94328
				708.467	0.63414						708.491	0.94308
				708.476	0.62838						708.5	0.94301
				708.485	0.62266						708.508	0.94305
				708.494	0.61696						708.517	0.94319
				708.503	0.61131						708.526	0.94339
				708.512	0.60568						708.534	0.94363
				708.521	0.6001						708.543	0.94388
				708.53	0.59455						708.552	0.94412
				708.539	0.58904						708.56	0.94431
				708.548	0.58357						708.569	0.94441
				708.557	0.57814						708.578	0.9444
				708.566	0.57275						708.586	0.94424
				708.575	0.56741						708.595	0.94388
				708.584	0.56211						708.604	0.94331
				708.593	0.55686						708.612	0.94248
				708.602	0.55165						708.621	0.94136
				708.611	0.54648						708.63	0.93991
				708.62	0.54137						708.638	0.9381
				708.629	0.5363						708.647	0.93589
				708.638	0.53127						708.656	0.93327
				708.647	0.5263						708.664	0.9302
				708.656	0.52138						708.673	0.92665
				708.665	0.5165						708.682	0.9226
				708.674	0.51167						708.69	0.91804
				708.683	0.50688						708.699	0.91295
				708.692	0.50214						708.707	0.9073
				708.701	0.49745						708.716	0.9011
				708.71	0.49281						708.725	0.89434
				708.719	0.4882						708.733	0.887
				708.728	0.48365						708.742	0.8791
				708.737	0.47913						708.751	0.87064
				708.746	0.47466						708.759	0.86162
				708.755	0.47023						708.768	0.85205
				708.764	0.46584						708.777	0.84196
				708.773	0.46149						708.785	0.83135
				708.782	0.45718						708.794	0.82026
				708.791	0.45291						708.803	0.80869
				708.8	0.44867						708.811	0.79669
				708.809	0.44447						708.82	0.78427
				708.818	0.4403						708.829	0.77148
				708.827	0.43617						708.837	0.75834
				708.836	0.43207						708.846	0.74488
				708.845	0.428						708.855	0.73115
				708.854	0.42397						708.863	0.71717
				708.863	0.41996						708.872	0.703
				708.872	0.41598						708.881	0.68865
				708.881	0.41203						708.889	0.67419
				708.89	0.40811						708.898	0.65963
				708.899	0.40422						708.907	0.64502
				708.908	0.40036						708.915	0.63039
				708.917	0.39652						708.924	0.61579
				708.926	0.39271						708.933	0.60123
				708.935	0.38892						708.941	0.58677
				708.944	0.38516						708.95	0.57243
				708.953	0.38142						708.959	0.55823
				708.962	0.37771						708.967	0.54421
				708.971	0.37402						708.976	0.53039
				708.98	0.37036						708.985	0.51681
				708.989	0.36673						708.993	0.50347
				708.998	0.36312						709.002	0.4904
				709.007	0.35955						709.011	0.47761
				709.016	0.35599						709.019	0.46514
				709.025	0.35247						709.028	0.45298
				709.034	0.34897						709.036	0.44115
				709.043	0.34551						709.045	0.42966
				709.052	0.34207						709.054	0.41851
				709.061	0.33866						709.062	0.40772
				709.07	0.33529						709.071	0.39729
				709.079	0.33195						709.08	0.38722
				709.088	0.32864						709.088	0.37752
				709.097	0.32536						709.097	0.36818
				709.106	0.32212						709.106	0.3592
				709.115	0.31892						709.114	0.35057
				709.124	0.31576						709.123	0.34231
				709.133	0.31263						709.132	0.33439
				709.142	0.30954						709.14	0.32682
				709.151	0.30648						709.149	0.31958
				709.16	0.30347						709.158	0.31268
				709.169	0.30051						709.166	0.3061
				709.178	0.29758						709.175	0.29983
				709.187	0.2947						709.184	0.29387
				709.196	0.29186						709.192	0.28821
				709.205	0.28907						709.201	0.28283
				709.214	0.28632						709.21	0.27773
				709.223	0.28361						709.218	0.27289
				709.232	0.28095						709.227	0.26832
				709.241	0.27834						709.236	0.26398
				709.25	0.27577						709.244	0.25989
				709.259	0.27325						709.253	0.25602
				709.268	0.27077						709.262	0.25237
				709.277	0.26834						709.27	0.24892
				709.286	0.26596						709.279	0.24568
				709.295	0.26363						709.288	0.24262
				709.304	0.26134						709.296	0.23973
				709.313	0.2591						709.305	0.23702
				709.322	0.2569						709.314	0.23447
				709.331	0.25475						709.322	0.23207
				709.34	0.25264						709.331	0.22982
				709.349	0.25058						709.34	0.22771
				709.357	0.24857						709.348	0.22572
				709.366	0.2466						709.357	0.22387
				709.375	0.24468						709.365	0.22213
				709.384	0.24281						709.374	0.2205
				709.393	0.24098						709.383	0.21898
				709.402	0.2392						709.391	0.21757
				709.411	0.23746						709.4	0.21626
				709.42	0.23577						709.409	0.21504
				709.429	0.23412						709.417	0.21392
				709.438	0.23252						709.426	0.21289
				709.447	0.23097						709.435	0.21195
				709.456	0.22946						709.443	0.21109
				709.465	0.228						709.452	0.21033
				709.474	0.22659						709.461	0.20965
				709.483	0.22523						709.469	0.20906
				709.492	0.22391						709.478	0.20855
				709.501	0.22264						709.487	0.20813
				709.51	0.22142						709.495	0.20781
				709.519	0.22025						709.504	0.20757
				709.528	0.21912						709.513	0.20743
				709.537	0.21805						709.521	0.20738
				709.546	0.21702						709.53	0.20742
				709.555	0.21604						709.539	0.20757
				709.564	0.21511						709.547	0.20782
				709.573	0.21423						709.556	0.20817
				709.582	0.21339						709.565	0.20863
				709.591	0.2126						709.573	0.2092
				709.6	0.21185						709.582	0.20988
				709.609	0.21115						709.591	0.21067
				709.618	0.21049						709.599	0.21159
				709.627	0.20988						709.608	0.21261
				709.636	0.20931						709.617	0.21376
				709.645	0.20877						709.625	0.21503
				709.654	0.20828						709.634	0.21642
				709.663	0.20783						709.643	0.21793
				709.672	0.20741						709.651	0.21955
				709.681	0.20702						709.66	0.2213
				709.69	0.20667						709.669	0.22316
				709.699	0.20634						709.677	0.22514
				709.708	0.20605						709.686	0.22722
				709.717	0.20578						709.694	0.22941
				709.726	0.20553						709.703	0.2317
				709.735	0.20531						709.712	0.23408
				709.744	0.2051						709.72	0.23655
				709.753	0.20492						709.729	0.2391
				709.762	0.20475						709.738	0.24171
				709.771	0.20459						709.746	0.24439
				709.78	0.20445						709.755	0.24712
				709.789	0.20432						709.764	0.24989
				709.798	0.20419						709.772	0.25269
				709.807	0.20408						709.781	0.2555
				709.816	0.20397						709.79	0.25832
				709.825	0.20386						709.798	0.26112
				709.834	0.20376						709.807	0.2639
				709.843	0.20367						709.816	0.26664
				709.852	0.20357						709.824	0.26933
				709.861	0.20348						709.833	0.27195
				709.87	0.20339						709.842	0.27449
				709.879	0.2033						709.85	0.27693
				709.888	0.2032						709.859	0.27926
				709.897	0.20311						709.868	0.28146
				709.906	0.20302						709.876	0.28352
				709.915	0.20293						709.885	0.28543
				709.924	0.20284						709.894	0.28717
				709.933	0.20276						709.902	0.28874
				709.942	0.20267						709.911	0.29011
				709.951	0.20259						709.92	0.29129
				709.96	0.20251						709.928	0.29226
				709.969	0.20244						709.937	0.29302
				709.978	0.20237						709.946	0.29355
				709.987	0.2023						709.954	0.29386
				709.996	0.20225						709.963	0.29393
				710.005	0.2022						709.972	0.29377
				710.014	0.20215						709.98	0.29337
				710.023	0.20212						709.989	0.29273
				710.032	0.20209						709.998	0.29186
				710.041	0.20208						710.006	0.29075
				710.05	0.20207						710.015	0.28942
				710.059	0.20207						710.024	0.28786
				710.068	0.20209						710.032	0.28609
				710.077	0.20211						710.041	0.2841
				710.086	0.20215						710.049	0.28191
				710.095	0.20219						710.058	0.27954
				710.104	0.20224						710.067	0.27698
				710.113	0.2023						710.075	0.27425
				710.122	0.20237						710.084	0.27136
				710.131	0.20245						710.093	0.26833
				710.14	0.20254						710.101	0.26517
				710.149	0.20263						710.11	0.26189
				710.158	0.20272						710.119	0.25851
				710.167	0.20281						710.127	0.25503
				710.176	0.20291						710.136	0.25148
				710.185	0.203						710.145	0.24787
				710.194	0.20309						710.153	0.24421
				710.203	0.20318						710.162	0.24052
				710.212	0.20326						710.171	0.2368
				710.221	0.20333						710.179	0.23308
				710.23	0.20339						710.188	0.22936
				710.239	0.20344						710.197	0.22565
				710.248	0.20348						710.205	0.22197
				710.257	0.2035						710.214	0.21832
				710.266	0.2035						710.223	0.21472
				710.275	0.20349						710.231	0.21117
				710.284	0.20345						710.24	0.20769
				710.293	0.20339						710.249	0.20427
				710.302	0.2033						710.257	0.20093
				710.311	0.20319						710.266	0.19766
				710.319	0.20305						710.275	0.19448
				710.328	0.20289						710.283	0.19139
				710.337	0.20269						710.292	0.18838
				710.346	0.20247						710.301	0.18547
				710.355	0.20221						710.309	0.18265
				710.364	0.20193						710.318	0.17992
				710.373	0.20161						710.327	0.17728
				710.382	0.20127						710.335	0.17474
				710.391	0.20089						710.344	0.17228
				710.4	0.20049						710.353	0.16992
				710.409	0.20005						710.361	0.16764
				710.418	0.19958						710.37	0.16544
				710.427	0.19908						710.378	0.16332
				710.436	0.19856						710.387	0.16128
				710.445	0.19801						710.396	0.15931
				710.454	0.19743						710.404	0.15741
				710.463	0.19683						710.413	0.15557
				710.472	0.1962						710.422	0.1538
				710.481	0.19555						710.43	0.15207
				710.49	0.19488						710.439	0.1504
				710.499	0.19419						710.448	0.14878
				710.508	0.19348						710.456	0.1472
				710.517	0.19275						710.465	0.14566
				710.526	0.192						710.474	0.14416
				710.535	0.19124						710.482	0.14268
				710.544	0.19046						710.491	0.14124
				710.553	0.18967						710.5	0.13982
				710.562	0.18887						710.508	0.13842
				710.571	0.18806						710.517	0.13703
				710.58	0.18724						710.526	0.13567
				710.589	0.1864						710.534	0.13431
				710.598	0.18556						710.543	0.13297
				710.607	0.18471						710.552	0.13164
				710.616	0.18385						710.56	0.13031
				710.625	0.18298						710.569	0.12899
				710.634	0.1821						710.578	0.12768
				710.643	0.18122						710.586	0.12636
				710.652	0.18033						710.595	0.12506
				710.661	0.17944						710.604	0.12375
				710.67	0.17853						710.612	0.12245
				710.679	0.17762						710.621	0.12115
				710.688	0.1767						710.63	0.11986
				710.697	0.17578						710.638	0.11856
				710.706	0.17484						710.647	0.11728
				710.715	0.1739						710.656	0.11599
				710.724	0.17294						710.664	0.11471
				710.733	0.17198						710.673	0.11344
				710.742	0.171						710.682	0.11217
				710.751	0.17002						710.69	0.11091
				710.76	0.16902						710.699	0.10966
				710.769	0.16801						710.707	0.10842
				710.778	0.16698						710.716	0.10719
				710.787	0.16594						710.725	0.10597
				710.796	0.16489						710.733	0.10477
				710.805	0.16382						710.742	0.10359
				710.814	0.16274						710.751	0.10242
				710.823	0.16164						710.759	0.10126
				710.832	0.16052						710.768	0.10013
				710.841	0.15938						710.777	0.09902
				710.85	0.15823						710.785	0.09793
				710.859	0.15706						710.794	0.09686
				710.868	0.15587						710.803	0.09582
				710.877	0.15466						710.811	0.0948
				710.886	0.15343						710.82	0.09381
				710.895	0.15219						710.829	0.09285
				710.904	0.15093						710.837	0.09193
				710.913	0.14965						710.846	0.09103
				710.922	0.14835						710.855	0.09016
				710.931	0.14704						710.863	0.08934
				710.94	0.14571						710.872	0.08854
				710.949	0.14436						710.881	0.08779
				710.958	0.143						710.889	0.08707
				710.967	0.14163						710.898	0.08639
				710.976	0.14024						710.907	0.08576
				710.985	0.13885						710.915	0.08517
				710.994	0.13743						710.924	0.08462
				711.003	0.13601						710.933	0.08412
				711.012	0.13458						710.941	0.08366
				711.021	0.13314						710.95	0.08326
				711.03	0.13169						710.959	0.0829
				711.039	0.13024						710.967	0.08259
				711.048	0.12878						710.976	0.08234
				711.057	0.12732						710.985	0.08214
				711.066	0.12585						710.993	0.08199
				711.075	0.12439						711.002	0.0819
				711.084	0.12292						711.011	0.08186
				711.093	0.12145						711.019	0.08188
				711.102	0.11999						711.028	0.08195
				711.111	0.11853						711.036	0.08208
				711.12	0.11707						711.045	0.08227
				711.129	0.11562						711.054	0.08252
				711.138	0.11418						711.062	0.08283
				711.147	0.11274						711.071	0.08319
				711.156	0.11132						711.08	0.08361
				711.165	0.1099						711.088	0.08409
				711.174	0.10849						711.097	0.08462
				711.183	0.1071						711.106	0.08521
				711.192	0.10572						711.114	0.08585
				711.201	0.10435						711.123	0.08654
				711.21	0.103						711.132	0.08728
				711.219	0.10167						711.14	0.08807
				711.228	0.10035						711.149	0.0889
				711.237	0.09905						711.158	0.08977
				711.246	0.09777						711.166	0.09068
				711.255	0.09651						711.175	0.09163
				711.264	0.09526						711.184	0.09261
				711.273	0.09404						711.192	0.09361
				711.282	0.09284						711.201	0.09464
				711.29	0.09167						711.21	0.09569
				711.299	0.09052						711.218	0.09675
				711.308	0.08938						711.227	0.09781
				711.317	0.08828						711.236	0.09888
				711.326	0.0872						711.244	0.09995
				711.335	0.08614						711.253	0.101
				711.344	0.0851						711.262	0.10204
				711.353	0.0841						711.27	0.10306
				711.362	0.08311						711.279	0.10405
				711.371	0.08215						711.288	0.10501
				711.38	0.08122						711.296	0.10593
				711.389	0.08031						711.305	0.10681
				711.398	0.07942						711.314	0.10763
				711.407	0.07856						711.322	0.1084
				711.416	0.07772						711.331	0.10911
				711.425	0.07691						711.34	0.10974
				711.434	0.07612						711.348	0.11031
				711.443	0.07535						711.357	0.11079
				711.452	0.07461						711.365	0.1112
				711.461	0.07389						711.374	0.11152
				711.47	0.07318						711.383	0.11175
				711.479	0.0725						711.391	0.11189
				711.488	0.07184						711.4	0.11193
				711.497	0.07119						711.409	0.11188
				711.506	0.07057						711.417	0.11172
				711.515	0.06996						711.426	0.11147
				711.524	0.06937						711.435	0.11112
				711.533	0.06879						711.443	0.11067
				711.542	0.06823						711.452	0.11012
				711.551	0.06769						711.461	0.10948
				711.56	0.06715						711.469	0.10874
				711.569	0.06664						711.478	0.1079
				711.578	0.06613						711.487	0.10697
				711.587	0.06564						711.495	0.10596
				711.596	0.06515						711.504	0.10486
				711.605	0.06468						711.513	0.10368
				711.614	0.06422						711.521	0.10243
				711.623	0.06376						711.53	0.10111
				711.632	0.06332						711.539	0.09972
				711.641	0.06288						711.547	0.09826
				711.65	0.06245						711.556	0.09676
				711.659	0.06203						711.565	0.0952
				711.668	0.06161						711.573	0.0936
				711.677	0.06121						711.582	0.09196
				711.686	0.06081						711.591	0.09029
				711.695	0.06041						711.599	0.08858
				711.704	0.06003						711.608	0.08686
				711.713	0.05965						711.617	0.08512
				711.722	0.05927						711.625	0.08337
				711.731	0.0589						711.634	0.08161
				711.74	0.05854						711.643	0.07985
				711.749	0.05819						711.651	0.07809
				711.758	0.05784						711.66	0.07633
				711.767	0.0575						711.669	0.07459
				711.776	0.05716						711.677	0.07287
				711.785	0.05684						711.686	0.07116
				711.794	0.05651						711.694	0.06948
				711.803	0.0562						711.703	0.06782
				711.812	0.0559						711.712	0.06618
				711.821	0.0556						711.72	0.06458
				711.83	0.05531						711.729	0.06301
				711.839	0.05503						711.738	0.06147
				711.848	0.05476						711.746	0.05997
				711.857	0.0545						711.755	0.0585
				711.866	0.05425						711.764	0.05707
				711.875	0.054						711.772	0.05568
				711.884	0.05377						711.781	0.05432
				711.893	0.05354						711.79	0.05301
				711.902	0.05333						711.798	0.05173
				711.911	0.05312						711.807	0.0505
				711.92	0.05293						711.816	0.0493
				711.929	0.05274						711.824	0.04814
				711.938	0.05256						711.833	0.04702
				711.947	0.05239						711.842	0.04593
				711.956	0.05223						711.85	0.04488
				711.965	0.05208						711.859	0.04387
				711.974	0.05194						711.868	0.04289
				711.983	0.0518						711.876	0.04195
				711.992	0.05168						711.885	0.04104
				712.001	0.05156						711.894	0.04016
				712.01	0.05145						711.902	0.03931
				712.019	0.05134						711.911	0.03849
				712.028	0.05124						711.92	0.0377
				712.037	0.05115						711.928	0.03693
				712.046	0.05106						711.937	0.0362
				712.055	0.05098						711.946	0.03549
				712.064	0.0509						711.954	0.0348
				712.073	0.05082						711.963	0.03414
				712.082	0.05074						711.972	0.0335
				712.091	0.05067						711.98	0.03288
				712.1	0.0506						711.989	0.03228
				712.109	0.05053						711.998	0.0317
				712.118	0.05046						712.006	0.03114
				712.127	0.0504						712.015	0.0306
				712.136	0.05033						712.024	0.03007
				712.145	0.05025						712.032	0.02957
				712.154	0.05018						712.041	0.02907
				712.163	0.0501						712.049	0.0286
				712.172	0.05002						712.058	0.02814
				712.181	0.04994						712.067	0.02769
				712.19	0.04985						712.075	0.02726
				712.199	0.04976						712.084	0.02684
				712.208	0.04966						712.093	0.02643
				712.217	0.04956						712.101	0.02603
				712.226	0.04945						712.11	0.02565
				712.235	0.04934						712.119	0.02527
				712.244	0.04922						712.127	0.02491
				712.253	0.04909						712.136	0.02456
				712.261	0.04895						712.145	0.02422
				712.27	0.04881						712.153	0.02389
				712.279	0.04866						712.162	0.02357
				712.288	0.04851						712.171	0.02325
				712.297	0.04834						712.179	0.02295
				712.306	0.04817						712.188	0.02266
				712.315	0.04799						712.197	0.02237
				712.324	0.0478						712.205	0.02209
				712.333	0.04761						712.214	0.02182
				712.342	0.04741						712.223	0.02156
				712.351	0.0472						712.231	0.02131
				712.36	0.04699						712.24	0.02106
				712.369	0.04677						712.249	0.02082
				712.378	0.04655						712.257	0.02059
				712.387	0.04632						712.266	0.02037
				712.396	0.04608						712.275	0.02015
				712.405	0.04584						712.283	0.01994
				712.414	0.0456						712.292	0.01974
				712.423	0.04535						712.301	0.01954
				712.432	0.0451						712.309	0.01935
				712.441	0.04484						712.318	0.01916
				712.45	0.04458						712.327	0.01898
				712.459	0.04432						712.335	0.01881
				712.468	0.04406						712.344	0.01864
				712.477	0.04379						712.352	0.01848
				712.486	0.04353						712.361	0.01832
				712.495	0.04326						712.37	0.01816
				712.504	0.043						712.378	0.01802
				712.513	0.04273						712.387	0.01787
				712.522	0.04246						712.396	0.01774
				712.531	0.04219						712.404	0.0176
				712.54	0.04193						712.413	0.01747
				712.549	0.04166						712.422	0.01735
				712.558	0.0414						712.43	0.01722
				712.567	0.04114						712.439	0.01711
				712.576	0.04088						712.448	0.01699
				712.585	0.04062						712.456	0.01688
				712.594	0.04036						712.465	0.01677
				712.603	0.04011						712.474	0.01667
				712.612	0.03986						712.482	0.01657
				712.621	0.03961						712.491	0.01647
				712.63	0.03936						712.5	0.01637
				712.639	0.03912						712.508	0.01628
				712.648	0.03888						712.517	0.01618
				712.657	0.03864						712.526	0.01609
				712.666	0.0384						712.534	0.01601
				712.675	0.03817						712.543	0.01592
				712.684	0.03794						712.552	0.01583
				712.693	0.03771						712.56	0.01575
				712.702	0.03749						712.569	0.01567
				712.711	0.03727						712.578	0.01559
				712.72	0.03705						712.586	0.01551
				712.729	0.03683						712.595	0.01543
				712.738	0.03662						712.604	0.01535
				712.747	0.0364						712.612	0.01527
				712.756	0.03619						712.621	0.0152
				712.765	0.03599						712.63	0.01512
				712.774	0.03578						712.638	0.01504
				712.783	0.03558						712.647	0.01497
				712.792	0.03538						712.656	0.01489
				712.801	0.03518						712.664	0.01482
				712.81	0.03498						712.673	0.01475
				712.819	0.03478						712.682	0.01467
				712.828	0.03459						712.69	0.0146
				712.837	0.03439						712.699	0.01453
				712.846	0.0342						712.707	0.01445
				712.855	0.03401						712.716	0.01438
				712.864	0.03382						712.725	0.01431
				712.873	0.03363						712.733	0.01424
				712.882	0.03344						712.742	0.01417
				712.891	0.03325						712.751	0.0141
				712.9	0.03306						712.759	0.01403
				712.909	0.03288						712.768	0.01397
				712.918	0.03269						712.777	0.0139
				712.927	0.0325						712.785	0.01384
				712.936	0.03231						712.794	0.01378
				712.945	0.03213						712.803	0.01371
				712.954	0.03194						712.811	0.01365
				712.963	0.03175						712.82	0.0136
				712.972	0.03157						712.829	0.01354
				712.981	0.03138						712.837	0.01348
				712.99	0.0312						712.846	0.01343
				712.999	0.03101						712.855	0.01338
				713.008	0.03082						712.863	0.01333
				713.017	0.03064						712.872	0.01329
				713.026	0.03045						712.881	0.01324
				713.035	0.03026						712.889	0.0132
				713.044	0.03008						712.898	0.01316
				713.053	0.02989						712.907	0.01313
				713.062	0.02971						712.915	0.0131
				713.071	0.02952						712.924	0.01306
				713.08	0.02934						712.933	0.01304
				713.089	0.02916						712.941	0.01301
				713.098	0.02897						712.95	0.01299
				713.107	0.02879						712.959	0.01297
				713.116	0.02861						712.967	0.01295
				713.125	0.02843						712.976	0.01293
				713.134	0.02826						712.985	0.01292
				713.143	0.02808						712.993	0.01291
				713.152	0.02791						713.002	0.0129
				713.161	0.02773						713.011	0.01289
				713.17	0.02756						713.019	0.01289
				713.179	0.0274						713.028	0.01288
				713.188	0.02723						713.036	0.01288
				713.197	0.02706						713.045	0.01288
				713.206	0.0269						713.054	0.01288
				713.215	0.02674						713.062	0.01288
				713.223	0.02658						713.071	0.01288
				713.232	0.02643						713.08	0.01289
				713.241	0.02627						713.088	0.01289
				713.25	0.02612						713.097	0.01289
				713.259	0.02597						713.106	0.01289
				713.268	0.02582						713.114	0.01289
				713.277	0.02567						713.123	0.01289
				713.286	0.02552						713.132	0.01289
				713.295	0.02538						713.14	0.01289
				713.304	0.02524						713.149	0.01289
				713.313	0.02509						713.158	0.01288
				713.322	0.02495						713.166	0.01288
				713.331	0.02481						713.175	0.01287
				713.34	0.02466						713.184	0.01286
				713.349	0.02452						713.192	0.01284
				713.358	0.02437						713.201	0.01283
				713.367	0.02423						713.21	0.01281
				713.376	0.02409						713.218	0.01278
				713.385	0.02394						713.227	0.01276
				713.394	0.0238						713.236	0.01273
				713.403	0.02365						713.244	0.0127
				713.412	0.02351						713.253	0.01266
				713.421	0.02336						713.262	0.01263
				713.43	0.02321						713.27	0.01258
				713.439	0.02305						713.279	0.01254
				713.448	0.0229						713.288	0.01249
				713.457	0.02275						713.296	0.01244
				713.466	0.02259						713.305	0.01239
				713.475	0.02244						713.314	0.01233
				713.484	0.02228						713.322	0.01228
				713.493	0.02212						713.331	0.01222
				713.502	0.02196						713.34	0.01215
				713.511	0.0218						713.348	0.01209
				713.52	0.02164						713.357	0.01202
				713.529	0.02148						713.365	0.01195
				713.538	0.02132						713.374	0.01188
				713.547	0.02116						713.383	0.01181
				713.556	0.021						713.391	0.01173
				713.565	0.02084						713.4	0.01166
				713.574	0.02069						713.409	0.01158
				713.583	0.02053						713.417	0.01151
				713.592	0.02038						713.426	0.01143
				713.601	0.02023						713.435	0.01136
				713.61	0.02008						713.443	0.01128
				713.619	0.01993						713.452	0.01121
				713.628	0.01978						713.461	0.01113
				713.637	0.01964						713.469	0.01106
				713.646	0.01951						713.478	0.01098
				713.655	0.01938						713.487	0.01091
				713.664	0.01925						713.495	0.01084
				713.673	0.01913						713.504	0.01076
				713.682	0.01901						713.513	0.01069
				713.691	0.0189						713.521	0.01062
				713.7	0.01879						713.53	0.01056
				713.709	0.01869						713.539	0.01049
				713.718	0.01859						713.547	0.01042
				713.727	0.0185						713.556	0.01036
				713.736	0.01841						713.565	0.0103
				713.745	0.01833						713.573	0.01024
				713.754	0.01826						713.582	0.01017
				713.763	0.01819						713.591	0.01011
				713.772	0.01812						713.599	0.01006
				713.781	0.01806						713.608	0.01
				713.79	0.018						713.617	0.00994
				713.799	0.01795						713.625	0.00988
				713.808	0.01791						713.634	0.00983
				713.817	0.01787						713.643	0.00977
				713.826	0.01783						713.651	0.00972
				713.835	0.0178						713.66	0.00967
				713.844	0.01777						713.669	0.00961
				713.853	0.01774						713.677	0.00956
				713.862	0.01772						713.686	0.00951
				713.871	0.01769						713.694	0.00945
				713.88	0.01767						713.703	0.0094
				713.889	0.01766						713.712	0.00935
				713.898	0.01764						713.72	0.00929
				713.907	0.01762						713.729	0.00924
				713.916	0.01761						713.738	0.00919
				713.925	0.01759						713.746	0.00913
				713.934	0.01757						713.755	0.00908
				713.943	0.01756						713.764	0.00902
				713.952	0.01754						713.772	0.00897
				713.961	0.01752						713.781	0.00891
				713.97	0.0175						713.79	0.00886
				713.979	0.01748						713.798	0.0088
				713.988	0.01745						713.807	0.00874
				713.997	0.01742						713.816	0.00869
				714.006	0.01739						713.824	0.00863
				714.015	0.01736						713.833	0.00857
				714.024	0.01733						713.842	0.00851
				714.033	0.01729						713.85	0.00845
				714.042	0.01725						713.859	0.0084
				714.051	0.0172						713.868	0.00834
				714.06	0.01716						713.876	0.00828
				714.069	0.01711						713.885	0.00822
				714.078	0.01705						713.894	0.00816
				714.087	0.017						713.902	0.00811
				714.096	0.01694						713.911	0.00805
				714.105	0.01688						713.92	0.00799
				714.114	0.01682						713.928	0.00793
				714.123	0.01675						713.937	0.00788
				714.132	0.01669						713.946	0.00782
				714.141	0.01662						713.954	0.00776
				714.15	0.01655						713.963	0.00771
				714.159	0.01647						713.972	0.00766
				714.168	0.0164						713.98	0.0076
				714.177	0.01632						713.989	0.00755
				714.185	0.01625						713.998	0.0075
				714.194	0.01617						714.006	0.00745
				714.203	0.0161						714.015	0.0074
				714.212	0.01602						714.024	0.00735
				714.221	0.01594						714.032	0.0073
				714.23	0.01587						714.041	0.00725
				714.239	0.01579						714.049	0.0072
				714.248	0.01571						714.058	0.00716
				714.257	0.01564						714.067	0.00711
				714.266	0.01556						714.075	0.00707
				714.275	0.01549						714.084	0.00702
				714.284	0.01541						714.093	0.00698
				714.293	0.01534						714.101	0.00694
				714.302	0.01527						714.11	0.0069
				714.311	0.0152						714.119	0.00686
				714.32	0.01513						714.127	0.00682
				714.329	0.01506						714.136	0.00679
				714.338	0.01499						714.145	0.00675
				714.347	0.01492						714.153	0.00672
				714.356	0.01485						714.162	0.00668
				714.365	0.01478						714.171	0.00665
				714.374	0.01472						714.179	0.00661
				714.383	0.01465						714.188	0.00658
				714.392	0.01458						714.197	0.00655
				714.401	0.01452						714.205	0.00652
				714.41	0.01445						714.214	0.00649
				714.419	0.01438						714.223	0.00647
				714.428	0.01431						714.231	0.00644
				714.437	0.01424						714.24	0.00641
				714.446	0.01417						714.249	0.00638
				714.455	0.01409						714.257	0.00636
				714.464	0.01402						714.266	0.00633
				714.473	0.01395						714.275	0.00631
				714.482	0.01387						714.283	0.00629
				714.491	0.01379						714.292	0.00626
				714.5	0.01372						714.301	0.00624
				714.509	0.01364						714.309	0.00622
				714.518	0.01355						714.318	0.0062
				714.527	0.01347						714.327	0.00618
				714.536	0.01338						714.335	0.00616
				714.545	0.0133						714.344	0.00614
				714.554	0.01321						714.352	0.00612
				714.563	0.01312						714.361	0.0061
				714.572	0.01303						714.37	0.00609
				714.581	0.01293						714.378	0.00607
				714.59	0.01284						714.387	0.00605
				714.599	0.01274						714.396	0.00604
				714.608	0.01265						714.404	0.00602
				714.617	0.01255						714.413	0.00601
				714.626	0.01245						714.422	0.00599
				714.635	0.01235						714.43	0.00598
				714.644	0.01224						714.439	0.00596
				714.653	0.01214						714.448	0.00595
				714.662	0.01204						714.456	0.00594
				714.671	0.01194						714.465	0.00592
				714.68	0.01183						714.474	0.00591
				714.689	0.01173						714.482	0.0059
				714.698	0.01163						714.491	0.00589
				714.707	0.01153						714.5	0.00587
				714.716	0.01142						714.508	0.00586
				714.725	0.01132						714.517	0.00585
				714.734	0.01122						714.526	0.00584
				714.743	0.01112						714.534	0.00583
				714.752	0.01102						714.543	0.00582
				714.761	0.01092						714.552	0.00581
				714.77	0.01083						714.56	0.0058
				714.779	0.01073						714.569	0.00578
				714.788	0.01064						714.578	0.00577
				714.797	0.01055						714.586	0.00576
				714.806	0.01046						714.595	0.00575
				714.815	0.01037						714.604	0.00574
				714.824	0.01028						714.612	0.00573
				714.833	0.0102						714.621	0.00572
				714.842	0.01012						714.63	0.00571
				714.851	0.01004						714.638	0.00569
				714.86	0.00996						714.647	0.00568
				714.869	0.00989						714.656	0.00567
				714.878	0.00981						714.664	0.00566
				714.887	0.00974						714.673	0.00565
				714.896	0.00968						714.682	0.00563
				714.905	0.00961						714.69	0.00562
				714.914	0.00954						714.699	0.00561
				714.923	0.00948						714.707	0.0056
				714.932	0.00942						714.716	0.00558
				714.941	0.00936						714.725	0.00557
				714.95	0.00931						714.733	0.00555
				714.959	0.00925						714.742	0.00554
				714.968	0.0092						714.751	0.00553
				714.977	0.00915						714.759	0.00551
				714.986	0.0091						714.768	0.0055
				714.995	0.00905						714.777	0.00548
				715.004	0.00901						714.785	0.00547
				715.013	0.00896						714.794	0.00545
				715.022	0.00892						714.803	0.00544
				715.031	0.00887						714.811	0.00542
				715.04	0.00883						714.82	0.0054
				715.049	0.00879						714.829	0.00539
				715.058	0.00875						714.837	0.00537
				715.067	0.00871						714.846	0.00536
				715.076	0.00867						714.855	0.00534
				715.085	0.00864						714.863	0.00533
				715.094	0.0086						714.872	0.00531
				715.103	0.00856						714.881	0.00529
				715.112	0.00852						714.889	0.00528
				715.121	0.00848						714.898	0.00526
				715.13	0.00845						714.907	0.00525
				715.139	0.00841						714.915	0.00523
				715.147	0.00838						714.924	0.00521
				715.156	0.00834						714.933	0.0052
				715.165	0.00831						714.941	0.00518
				715.174	0.00828						714.95	0.00517
				715.183	0.00824						714.959	0.00515
				715.192	0.00821						714.967	0.00514
				715.201	0.00817						714.976	0.00512
				715.21	0.00814						714.985	0.00511
				715.219	0.0081						714.993	0.00509
				715.228	0.00807						715.002	0.00508
				715.237	0.00804						715.011	0.00506
				715.246	0.008						715.019	0.00505
				715.255	0.00797						715.028	0.00504
				715.264	0.00794						715.036	0.00502
				715.273	0.00791						715.045	0.00501
				715.282	0.00787						715.054	0.005
				715.291	0.00784						715.062	0.00498
				715.3	0.00781						715.071	0.00497
				715.309	0.00778						715.08	0.00496
				715.318	0.00775						715.088	0.00495
				715.327	0.00772						715.097	0.00494
				715.336	0.00769						715.106	0.00492
				715.345	0.00766						715.114	0.00491
				715.354	0.00763						715.123	0.0049
				715.363	0.0076						715.132	0.00489
				715.372	0.00757						715.14	0.00488
				715.381	0.00754						715.149	0.00487
				715.39	0.00752						715.158	0.00486
				715.399	0.00749						715.166	0.00485
				715.408	0.00747						715.175	0.00484
				715.417	0.00744						715.184	0.00483
				715.426	0.00741						715.192	0.00482
				715.435	0.00738						715.201	0.00481
				715.444	0.00736						715.21	0.0048
				715.453	0.00733						715.218	0.00479
				715.462	0.00731						715.227	0.00478
				715.471	0.00728						715.236	0.00477
				715.48	0.00726						715.244	0.00476
				715.489	0.00723						715.253	0.00475
				715.498	0.00721						715.262	0.00474
				715.507	0.00718						715.27	0.00474
				715.516	0.00716						715.279	0.00473
				715.525	0.00713						715.288	0.00472
				715.534	0.00711						715.296	0.00471
				715.543	0.00709						715.305	0.0047
				715.552	0.00707						715.314	0.0047
				715.561	0.00704						715.322	0.00469
				715.57	0.00702						715.331	0.00468
				715.579	0.007						715.34	0.00467
				715.588	0.00698						715.348	0.00467
				715.597	0.00696						715.357	0.00466
				715.606	0.00694						715.365	0.00465
				715.615	0.00692						715.374	0.00464
				715.624	0.0069						715.383	0.00464
				715.633	0.00687						715.391	0.00463
				715.642	0.00686						715.4	0.00462
				715.651	0.00684						715.409	0.00462
				715.66	0.00682						715.417	0.00461
				715.669	0.0068						715.426	0.0046
				715.678	0.00678						715.435	0.0046
				715.687	0.00677						715.443	0.00459
				715.696	0.00675						715.452	0.00459
				715.705	0.00673						715.461	0.00458
				715.714	0.00672						715.469	0.00457
				715.723	0.0067						715.478	0.00457
				715.732	0.00669						715.487	0.00456
				715.741	0.00668						715.495	0.00456
				715.75	0.00666						715.504	0.00455
				715.759	0.00665						715.513	0.00455
				715.768	0.00664						715.521	0.00454
				715.777	0.00663						715.53	0.00454
				715.786	0.00662						715.539	0.00453
				715.795	0.00661						715.547	0.00453
				715.804	0.0066						715.556	0.00452
				715.813	0.00659						715.565	0.00452
				715.822	0.00658						715.573	0.00451
				715.831	0.00657						715.582	0.00451
				715.84	0.00657						715.591	0.0045
				715.849	0.00656						715.599	0.0045
				715.858	0.00656						715.608	0.00449
				715.867	0.00655						715.617	0.00449
				715.876	0.00655						715.625	0.00448
				715.885	0.00655						715.634	0.00448
				715.894	0.00655						715.643	0.00447
				715.903	0.00655						715.651	0.00447
				715.912	0.00655						715.66	0.00447
				715.921	0.00655						715.669	0.00446
				715.93	0.00655						715.677	0.00446
				715.939	0.00655						715.686	0.00445
				715.948	0.00655						715.694	0.00445
				715.957	0.00656						715.703	0.00445
				715.966	0.00656						715.712	0.00444
				715.975	0.00656						715.72	0.00444
				715.984	0.00657						715.729	0.00444
				715.993	0.00658						715.738	0.00443
				716.002	0.00658						715.746	0.00443
				716.011	0.00659						715.755	0.00443
				716.02	0.0066						715.764	0.00442
				716.029	0.00661						715.772	0.00442
				716.038	0.00662						715.781	0.00442
				716.047	0.00664						715.79	0.00441
				716.056	0.00665						715.798	0.00441
				716.065	0.00666						715.807	0.00441
				716.074	0.00667						715.816	0.0044
				716.083	0.00669						715.824	0.0044
				716.092	0.0067						715.833	0.0044
				716.101	0.00672						715.842	0.00439
				716.109	0.00674						715.85	0.00439
				716.118	0.00676						715.859	0.00439
				716.127	0.00678						715.868	0.00439
				716.136	0.0068						715.876	0.00438
				716.145	0.00682						715.885	0.00438
				716.154	0.00684						715.894	0.00438
				716.163	0.00687						715.902	0.00438
				716.172	0.00689						715.911	0.00438
				716.181	0.00692						715.92	0.00437
				716.19	0.00695						715.928	0.00437
				716.199	0.00697						715.937	0.00437
				716.208	0.007						715.946	0.00437
				716.217	0.00703						715.954	0.00437
				716.226	0.00706						715.963	0.00436
				716.235	0.00709						715.972	0.00436
				716.244	0.00712						715.98	0.00436
				716.253	0.00716						715.989	0.00436
				716.262	0.00719						715.998	0.00436
				716.271	0.00722						716.006	0.00435
				716.28	0.00726						716.015	0.00435
				716.289	0.00729						716.024	0.00435
				716.298	0.00733						716.032	0.00435
				716.307	0.00737						716.041	0.00435
				716.316	0.0074						716.049	0.00435
				716.325	0.00744						716.058	0.00435
				716.334	0.00748						716.067	0.00435
				716.343	0.00751						716.075	0.00435
				716.352	0.00755						716.084	0.00434
				716.361	0.00759						716.093	0.00434
				716.37	0.00763						716.101	0.00434
				716.379	0.00767						716.11	0.00434
				716.388	0.0077						716.119	0.00434
				716.397	0.00774						716.127	0.00434
				716.406	0.00777						716.136	0.00434
				716.415	0.00781						716.145	0.00434
				716.424	0.00785						716.153	0.00434
				716.433	0.00788						716.162	0.00434
				716.442	0.00791						716.171	0.00434
				716.451	0.00794						716.179	0.00434
				716.46	0.00798						716.188	0.00434
				716.469	0.00801						716.197	0.00434
				716.478	0.00804						716.205	0.00434
				716.487	0.00806						716.214	0.00434
				716.496	0.00809						716.223	0.00434
				716.505	0.00812						716.231	0.00434
				716.514	0.00814						716.24	0.00434
				716.523	0.00816						716.249	0.00434
				716.532	0.00818						716.257	0.00434
				716.541	0.0082						716.266	0.00434
				716.55	0.00822						716.275	0.00434
				716.559	0.00824						716.283	0.00434
				716.568	0.00825						716.292	0.00434
				716.577	0.00827						716.301	0.00434
				716.586	0.00828						716.309	0.00434
				716.595	0.00829						716.318	0.00434
				716.604	0.0083						716.327	0.00434
				716.613	0.0083						716.335	0.00434
				716.622	0.00831						716.344	0.00434
				716.631	0.00831						716.352	0.00434
				716.64	0.00831						716.361	0.00434
				716.649	0.00831						716.37	0.00435
				716.658	0.00831						716.378	0.00435
				716.667	0.00831						716.387	0.00435
				716.676	0.0083						716.396	0.00435
				716.685	0.0083						716.404	0.00435
				716.694	0.00829						716.413	0.00435
				716.703	0.00829						716.422	0.00435
				716.712	0.00828						716.43	0.00436
				716.721	0.00827						716.439	0.00436
				716.73	0.00826						716.448	0.00436
				716.739	0.00825						716.456	0.00436
				716.748	0.00824						716.465	0.00436
				716.757	0.00823						716.474	0.00436
				716.766	0.00822						716.482	0.00437
				716.775	0.00821						716.491	0.00437
				716.784	0.0082						716.5	0.00437
				716.793	0.00819						716.508	0.00437
				716.802	0.00817						716.517	0.00438
				716.811	0.00816						716.526	0.00438
				716.82	0.00815						716.534	0.00438
				716.829	0.00814						716.543	0.00438
				716.838	0.00813						716.552	0.00438
				716.847	0.00812						716.56	0.00439
				716.856	0.00811						716.569	0.00439
				716.865	0.0081						716.578	0.00439
				716.874	0.00809						716.586	0.00439
				716.883	0.00808						716.595	0.0044
				716.892	0.00807						716.604	0.0044
				716.901	0.00807						716.612	0.0044
				716.91	0.00806						716.621	0.00441
				716.919	0.00806						716.63	0.00441
				716.928	0.00805						716.638	0.00441
				716.937	0.00805						716.647	0.00442
				716.946	0.00804						716.656	0.00442
				716.955	0.00804						716.664	0.00442
				716.964	0.00804						716.673	0.00443
				716.973	0.00805						716.682	0.00443
				716.982	0.00805						716.69	0.00444
				716.991	0.00805						716.699	0.00444
				717	0.00805						716.707	0.00444
				717.009	0.00806						716.716	0.00445
				717.018	0.00806						716.725	0.00445
				717.027	0.00807						716.733	0.00445
				717.036	0.00808						716.742	0.00446
				717.045	0.00808						716.751	0.00446
				717.054	0.00809						716.759	0.00447
				717.062	0.00811						716.768	0.00447
				717.071	0.00812						716.777	0.00448
				717.08	0.00813						716.785	0.00448
				717.089	0.00814						716.794	0.00449
				717.098	0.00816						716.803	0.00449
				717.107	0.00817						716.811	0.00449
				717.116	0.00819						716.82	0.0045
				717.125	0.00821						716.829	0.0045
				717.134	0.00822						716.837	0.00451
				717.143	0.00824						716.846	0.00452
				717.152	0.00826						716.855	0.00452
				717.161	0.00829						716.863	0.00453
				717.17	0.00831						716.872	0.00453
				717.179	0.00833						716.881	0.00454
				717.188	0.00836						716.889	0.00454
				717.197	0.00838						716.898	0.00455
				717.206	0.0084						716.907	0.00455
				717.215	0.00843						716.915	0.00456
				717.224	0.00846						716.924	0.00456
				717.233	0.00849						716.933	0.00457
				717.242	0.00852						716.941	0.00458
				717.251	0.00854						716.95	0.00458
				717.26	0.00857						716.959	0.00459
				717.269	0.0086						716.967	0.0046
				717.278	0.00863						716.976	0.0046
				717.287	0.00867						716.985	0.00461
				717.296	0.0087						716.993	0.00461
				717.305	0.00873						717.002	0.00462
				717.314	0.00877						717.011	0.00463
				717.323	0.0088						717.019	0.00464
				717.332	0.00884						717.028	0.00464
				717.341	0.00887						717.036	0.00465
				717.35	0.00891						717.045	0.00466
				717.359	0.00895						717.054	0.00466
				717.368	0.00899						717.062	0.00467
				717.377	0.00903						717.071	0.00468
				717.386	0.00907						717.08	0.00469
				717.395	0.00911						717.088	0.00469
				717.404	0.00915						717.097	0.0047
				717.413	0.00919						717.106	0.00471
				717.422	0.00924						717.114	0.00472
				717.431	0.00928						717.123	0.00473
				717.44	0.00932						717.132	0.00473
				717.449	0.00937						717.14	0.00474
				717.458	0.00941						717.149	0.00475
				717.467	0.00946						717.158	0.00476
				717.476	0.00951						717.166	0.00477
				717.485	0.00955						717.175	0.00478
				717.494	0.00961						717.184	0.00479
				717.503	0.00966						717.192	0.0048
				717.512	0.00971						717.201	0.0048
				717.521	0.00976						717.21	0.00481
				717.53	0.00981						717.218	0.00482
				717.539	0.00986						717.227	0.00483
				717.548	0.00992						717.236	0.00484
				717.557	0.00997						717.244	0.00485
				717.566	0.01003						717.253	0.00486
				717.575	0.01009						717.262	0.00487
				717.584	0.01014						717.27	0.00488
				717.593	0.0102						717.279	0.00489
				717.602	0.01026						717.288	0.0049
				717.611	0.01032						717.296	0.00491
				717.62	0.01039						717.305	0.00492
				717.629	0.01045						717.314	0.00493
				717.638	0.01051						717.322	0.00494
				717.647	0.01058						717.331	0.00496
				717.656	0.01064						717.34	0.00497
				717.665	0.01071						717.348	0.00498
				717.674	0.01078						717.357	0.00499
				717.683	0.01084						717.365	0.005
				717.692	0.01091						717.374	0.00501
				717.701	0.01099						717.383	0.00502
				717.71	0.01106						717.391	0.00504
				717.719	0.01113						717.4	0.00505
				717.728	0.01121						717.409	0.00506
				717.737	0.01128						717.417	0.00507
				717.746	0.01136						717.426	0.00508
				717.755	0.01144						717.435	0.0051
				717.764	0.01152						717.443	0.00511
				717.773	0.0116						717.452	0.00512
				717.782	0.01168						717.461	0.00513
				717.791	0.01177						717.469	0.00515
				717.8	0.01185						717.478	0.00516
				717.809	0.01194						717.487	0.00517
				717.818	0.01203						717.495	0.00519
				717.827	0.01212						717.504	0.0052
				717.836	0.01221						717.513	0.00522
				717.845	0.0123						717.521	0.00523
				717.854	0.0124						717.53	0.00524
				717.863	0.01249						717.539	0.00526
				717.872	0.01259						717.547	0.00527
				717.881	0.01269						717.556	0.00529
				717.89	0.01279						717.565	0.0053
				717.899	0.0129						717.573	0.00532
				717.908	0.013						717.582	0.00533
				717.917	0.01311						717.591	0.00535
				717.926	0.01322						717.599	0.00536
				717.935	0.01333						717.608	0.00538
				717.944	0.01344						717.617	0.0054
				717.953	0.01356						717.625	0.00541
				717.962	0.01368						717.634	0.00543
				717.971	0.0138						717.643	0.00544
				717.98	0.01392						717.651	0.00546
				717.989	0.01404						717.66	0.00548
				717.998	0.01417						717.669	0.00549
				718.007	0.0143						717.677	0.00551
				718.016	0.01443						717.686	0.00553
				718.024	0.01456						717.694	0.00555
				718.033	0.0147						717.703	0.00556
				718.042	0.01484						717.712	0.00558
				718.051	0.01498						717.72	0.0056
				718.06	0.01513						717.729	0.00562
				718.069	0.01528						717.738	0.00564
				718.078	0.01543						717.746	0.00566
				718.087	0.01558						717.755	0.00568
				718.096	0.01574						717.764	0.00569
				718.105	0.0159						717.772	0.00571
				718.114	0.01607						717.781	0.00573
				718.123	0.01624						717.79	0.00575
				718.132	0.01641						717.798	0.00577
				718.141	0.01659						717.807	0.00579
				718.15	0.01677						717.816	0.00581
				718.159	0.01695						717.824	0.00583
				718.168	0.01714						717.833	0.00586
				718.177	0.01733						717.842	0.00588
				718.186	0.01753						717.85	0.0059
				718.195	0.01773						717.859	0.00592
				718.204	0.01794						717.868	0.00594
				718.213	0.01815						717.876	0.00597
				718.222	0.01836						717.885	0.00599
				718.231	0.01859						717.894	0.00601
				718.24	0.01881						717.902	0.00603
				718.249	0.01905						717.911	0.00606
				718.258	0.01929						717.92	0.00608
				718.267	0.01953						717.928	0.0061
				718.276	0.01978						717.937	0.00613
				718.285	0.02004						717.946	0.00615
				718.294	0.0203						717.954	0.00618
				718.303	0.02058						717.963	0.0062
				718.312	0.02086						717.972	0.00623
				718.321	0.02114						717.98	0.00625
				718.33	0.02144						717.989	0.00628
				718.339	0.02174						717.998	0.00631
				718.348	0.02205						718.006	0.00633
				718.357	0.02237						718.015	0.00636
				718.366	0.0227						718.023	0.00639
				718.375	0.02304						718.032	0.00641
				718.384	0.02339						718.041	0.00644
				718.393	0.02375						718.049	0.00647
				718.402	0.02412						718.058	0.0065
				718.411	0.0245						718.067	0.00653
				718.42	0.0249						718.075	0.00655
				718.429	0.0253						718.084	0.00658
				718.438	0.02572						718.093	0.00661
				718.447	0.02615						718.101	0.00665
				718.456	0.0266						718.11	0.00668
				718.465	0.02706						718.119	0.00671
				718.474	0.02754						718.127	0.00674
				718.483	0.02803						718.136	0.00677
				718.492	0.02854						718.145	0.0068
				718.501	0.02906						718.153	0.00683
				718.51	0.0296						718.162	0.00687
				718.519	0.03017						718.171	0.0069
				718.528	0.03075						718.179	0.00693
				718.537	0.03135						718.188	0.00697
				718.546	0.03197						718.197	0.007
				718.555	0.03261						718.205	0.00704
				718.564	0.03328						718.214	0.00707
				718.573	0.03397						718.223	0.00711
				718.582	0.03468						718.231	0.00714
				718.591	0.03542						718.24	0.00718
				718.6	0.03619						718.249	0.00722
				718.609	0.03698						718.257	0.00725
				718.618	0.03781						718.266	0.00729
				718.627	0.03866						718.275	0.00733
				718.636	0.03955						718.283	0.00737
				718.645	0.04046						718.292	0.00741
				718.654	0.04142						718.301	0.00745
				718.663	0.0424						718.309	0.00749
				718.672	0.04343						718.318	0.00753
				718.681	0.04448						718.327	0.00757
				718.69	0.04558						718.335	0.00761
				718.699	0.04672						718.344	0.00766
				718.708	0.0479						718.352	0.0077
				718.717	0.04913						718.361	0.00775
				718.726	0.0504						718.37	0.00779
				718.735	0.05171						718.378	0.00783
				718.744	0.05307						718.387	0.00788
				718.753	0.05448						718.396	0.00793
				718.762	0.05594						718.404	0.00797
				718.771	0.05745						718.413	0.00802
				718.78	0.05901						718.422	0.00807
				718.789	0.06062						718.43	0.00812
				718.798	0.06229						718.439	0.00817
				718.807	0.06401						718.448	0.00822
				718.816	0.06579						718.456	0.00827
				718.825	0.06763						718.465	0.00832
				718.834	0.06952						718.474	0.00837
				718.843	0.07147						718.482	0.00843
				718.852	0.07348						718.491	0.00848
				718.861	0.07555						718.5	0.00853
				718.87	0.07768						718.508	0.00859
				718.879	0.07986						718.517	0.00865
				718.888	0.0821						718.526	0.0087
				718.897	0.0844						718.534	0.00876
				718.906	0.08675						718.543	0.00882
				718.915	0.08916						718.552	0.00888
				718.924	0.09163						718.56	0.00894
				718.933	0.09415						718.569	0.009
				718.942	0.09672						718.578	0.00906
				718.951	0.09934						718.586	0.00913
				718.96	0.102						718.595	0.00919
				718.969	0.10471						718.604	0.00926
				718.978	0.10746						718.612	0.00932
				718.986	0.11025						718.621	0.00939
				718.995	0.11307						718.63	0.00946
				719.004	0.11593						718.638	0.00953
				719.013	0.11881						718.647	0.0096
				719.022	0.12171						718.656	0.00967
				719.031	0.12464						718.664	0.00974
				719.04	0.12757						718.673	0.00982
				719.049	0.13052						718.682	0.00989
				719.058	0.13347						718.69	0.00997
				719.067	0.13642						718.699	0.01005
				719.076	0.13936						718.707	0.01013
				719.085	0.14229						718.716	0.01021
				719.094	0.1452						718.725	0.01029
				719.103	0.14809						718.733	0.01037
				719.112	0.15095						718.742	0.01046
				719.121	0.15377						718.751	0.01054
				719.13	0.15655						718.759	0.01063
				719.139	0.15929						718.768	0.01072
				719.148	0.16197						718.777	0.01081
				719.157	0.16459						718.785	0.0109
				719.166	0.16716						718.794	0.011
				719.175	0.16965						718.803	0.01109
				719.184	0.17206						718.811	0.01119
				719.193	0.1744						718.82	0.01129
				719.202	0.17665						718.829	0.01139
				719.211	0.17882						718.837	0.0115
				719.22	0.18089						718.846	0.0116
				719.229	0.18287						718.855	0.01171
				719.238	0.18475						718.863	0.01182
				719.247	0.18653						718.872	0.01193
				719.256	0.1882						718.881	0.01204
				719.265	0.18976						718.889	0.01216
				719.274	0.19122						718.898	0.01228
				719.283	0.19257						718.907	0.0124
				719.292	0.1938						718.915	0.01252
				719.301	0.19493						718.924	0.01265
				719.31	0.19594						718.933	0.01278
				719.319	0.19685						718.941	0.01291
				719.328	0.19765						718.95	0.01304
				719.337	0.19834						718.959	0.01318
				719.346	0.19893						718.967	0.01332
				719.355	0.19942						718.976	0.01347
				719.364	0.19981						718.985	0.01361
				719.373	0.2001						718.993	0.01376
				719.382	0.2003						719.002	0.01392
				719.391	0.20042						719.011	0.01408
				719.4	0.20046						719.019	0.01424
				719.409	0.20042						719.028	0.0144
				719.418	0.2003						719.036	0.01457
				719.427	0.20012						719.045	0.01475
				719.436	0.19988						719.054	0.01492
				719.445	0.19959						719.062	0.01511
				719.454	0.19925						719.071	0.01529
				719.463	0.19887						719.08	0.01549
				719.472	0.19846						719.088	0.01568
				719.481	0.19801						719.097	0.01589
				719.49	0.19754						719.106	0.0161
				719.499	0.19706						719.114	0.01631
				719.508	0.19657						719.123	0.01653
				719.517	0.19607						719.132	0.01675
				719.526	0.19557						719.14	0.01699
				719.535	0.19508						719.149	0.01723
				719.544	0.1946						719.158	0.01747
				719.553	0.19415						719.166	0.01773
				719.562	0.19371						719.175	0.01799
				719.571	0.19331						719.184	0.01825
				719.58	0.19294						719.192	0.01853
				719.589	0.1926						719.201	0.01881
				719.598	0.19231						719.21	0.01911
				719.607	0.19206						719.218	0.01941
				719.616	0.19186						719.227	0.01972
				719.625	0.19171						719.236	0.02004
				719.634	0.19161						719.244	0.02037
				719.643	0.19157						719.253	0.02071
				719.652	0.19159						719.262	0.02106
				719.661	0.19167						719.27	0.02143
				719.67	0.19181						719.279	0.0218
				719.679	0.19201						719.288	0.02218
				719.688	0.19227						719.296	0.02258
				719.697	0.19259						719.305	0.02299
				719.706	0.19298						719.314	0.02341
				719.715	0.19342						719.322	0.02384
				719.724	0.19393						719.331	0.02429
				719.733	0.19451						719.34	0.02475
				719.742	0.19514						719.348	0.02522
				719.751	0.19583						719.357	0.0257
				719.76	0.19657						719.365	0.0262
				719.769	0.19738						719.374	0.02672
				719.778	0.19823						719.383	0.02725
				719.787	0.19914						719.391	0.02779
				719.796	0.2001						719.4	0.02835
				719.805	0.20111						719.409	0.02892
				719.814	0.20216						719.417	0.02951
				719.823	0.20326						719.426	0.03011
				719.832	0.20439						719.435	0.03072
				719.841	0.20556						719.443	0.03135
				719.85	0.20677						719.452	0.032
				719.859	0.20802						719.461	0.03266
				719.868	0.20929						719.469	0.03334
				719.877	0.21059						719.478	0.03403
				719.886	0.21191						719.487	0.03473
				719.895	0.21326						719.495	0.03545
				719.904	0.21462						719.504	0.03618
				719.913	0.216						719.513	0.03693
				719.922	0.21739						719.521	0.03769
				719.931	0.21879						719.53	0.03846
				719.94	0.2202						719.539	0.03925
				719.949	0.22161						719.547	0.04005
				719.957	0.22302						719.556	0.04086
				719.966	0.22443						719.565	0.04169
				719.975	0.22583						719.573	0.04253
				719.984	0.22723						719.582	0.04338
				719.993	0.22861						719.591	0.04425
				720.002	0.22998						719.599	0.04512
				720.011	0.23134						719.608	0.04601
				720.02	0.23268						719.617	0.04691
				720.029	0.23399						719.625	0.04782
				720.038	0.23529						719.634	0.04875
				720.047	0.23656						719.643	0.04968
				720.056	0.23781						719.651	0.05063
				720.065	0.23903						719.66	0.05159
				720.074	0.24022						719.669	0.05256
				720.083	0.24139						719.677	0.05354
				720.092	0.24252						719.686	0.05453
				720.101	0.24364						719.694	0.05554
				720.11	0.24472						719.703	0.05655
				720.119	0.24578						719.712	0.05758
				720.128	0.24681						719.72	0.05862
				720.137	0.24782						719.729	0.05967
				720.146	0.24881						719.738	0.06073
				720.155	0.24978						719.746	0.0618
				720.164	0.25073						719.755	0.06288
				720.173	0.25167						719.764	0.06397
				720.182	0.25259						719.772	0.06506
				720.191	0.25351						719.781	0.06617
				720.2	0.25443						719.79	0.06729
				720.209	0.25534						719.798	0.06841
				720.218	0.25626						719.807	0.06954
				720.227	0.25719						719.816	0.07068
				720.236	0.25812						719.824	0.07182
				720.245	0.25907						719.833	0.07297
				720.254	0.26004						719.842	0.07412
				720.263	0.26104						719.85	0.07528
				720.272	0.26206						719.859	0.07643
				720.281	0.26311						719.868	0.07759
				720.29	0.26419						719.876	0.07874
				720.299	0.2653						719.885	0.0799
				720.308	0.26646						719.894	0.08105
				720.317	0.26765						719.902	0.0822
				720.326	0.26889						719.911	0.08334
				720.335	0.27016						719.92	0.08448
				720.344	0.27148						719.928	0.08561
				720.353	0.27285						719.937	0.08674
				720.362	0.27426						719.946	0.08786
				720.371	0.27571						719.954	0.08897
				720.38	0.2772						719.963	0.09008
				720.389	0.27873						719.972	0.09118
				720.398	0.2803						719.98	0.09227
				720.407	0.2819						719.989	0.09335
				720.416	0.28354						719.998	0.09443
				720.425	0.2852						720.006	0.0955
				720.434	0.28688						720.015	0.09658
				720.443	0.28858						720.023	0.09764
				720.452	0.2903						720.032	0.09871
				720.461	0.29202						720.041	0.09978
				720.47	0.29374						720.049	0.10085
				720.479	0.29547						720.058	0.10194
				720.488	0.29718						720.067	0.10302
				720.497	0.29888						720.075	0.10413
				720.506	0.30055						720.084	0.10524
				720.515	0.3022						720.093	0.10638
				720.524	0.30381						720.101	0.10753
				720.533	0.30539						720.11	0.10872
				720.542	0.30692						720.119	0.10993
				720.551	0.30839						720.127	0.11118
				720.56	0.30981						720.136	0.11246
				720.569	0.31116						720.145	0.11378
				720.578	0.31244						720.153	0.11515
				720.587	0.31366						720.162	0.11657
				720.596	0.31479						720.171	0.11804
				720.605	0.31584						720.179	0.11956
				720.614	0.3168						720.188	0.12115
				720.623	0.31767						720.197	0.12279
				720.632	0.31845						720.205	0.1245
				720.641	0.31914						720.214	0.12628
				720.65	0.31972						720.223	0.12812
				720.659	0.32021						720.231	0.13004
				720.668	0.32059						720.24	0.13203
				720.677	0.32087						720.249	0.13409
				720.686	0.32105						720.257	0.13622
				720.695	0.32113						720.266	0.13843
				720.704	0.3211						720.275	0.14071
				720.713	0.32098						720.283	0.14306
				720.722	0.32075						720.292	0.14548
				720.731	0.32042						720.301	0.14797
				720.74	0.32						720.309	0.15052
				720.749	0.31949						720.318	0.15314
				720.758	0.31888						720.327	0.15582
				720.767	0.31819						720.335	0.15855
				720.776	0.31741						720.344	0.16134
				720.785	0.31655						720.352	0.16417
				720.794	0.31562						720.361	0.16704
				720.803	0.31461						720.37	0.16995
				720.812	0.31354						720.378	0.1729
				720.821	0.3124						720.387	0.17587
				720.83	0.31122						720.396	0.17885
				720.839	0.30998						720.404	0.18186
				720.848	0.3087						720.413	0.18487
				720.857	0.30737						720.422	0.18788
				720.866	0.30602						720.43	0.19089
				720.875	0.30464						720.439	0.19388
				720.884	0.30323						720.448	0.19686
				720.893	0.30182						720.456	0.19982
				720.902	0.3004						720.465	0.20275
				720.911	0.29897						720.474	0.20565
				720.919	0.29755						720.482	0.2085
				720.928	0.29614						720.491	0.21132
				720.937	0.29474						720.5	0.21409
				720.946	0.29337						720.508	0.21681
				720.955	0.29202						720.517	0.21947
				720.964	0.29071						720.526	0.22208
				720.973	0.28943						720.534	0.22463
				720.982	0.28818						720.543	0.22713
				720.991	0.28699						720.552	0.22955
				721	0.28584						720.56	0.23192
				721.009	0.28473						720.569	0.23423
				721.018	0.28368						720.578	0.23647
				721.027	0.28269						720.586	0.23865
				721.036	0.28174						720.595	0.24078
				721.045	0.28085						720.604	0.24284
				721.054	0.28001						720.612	0.24486
				721.063	0.27923						720.621	0.24682
				721.072	0.2785						720.63	0.24874
				721.081	0.27781						720.638	0.25062
				721.09	0.27718						720.647	0.25246
				721.099	0.27658						720.656	0.25427
				721.108	0.27603						720.664	0.25605
				721.117	0.27551						720.673	0.25781
				721.126	0.27502						720.682	0.25956
				721.135	0.27455						720.69	0.26131
				721.144	0.27411						720.699	0.26305
				721.153	0.27368						720.707	0.2648
				721.162	0.27325						720.716	0.26657
				721.171	0.27283						720.725	0.26835
				721.18	0.2724						720.733	0.27017
				721.189	0.27196						720.742	0.27203
				721.198	0.27151						720.751	0.27393
				721.207	0.27102						720.759	0.27588
				721.216	0.27051						720.768	0.27789
				721.225	0.26995						720.777	0.27997
				721.234	0.26936						720.785	0.28212
				721.243	0.26871						720.794	0.28435
				721.252	0.26802						720.803	0.28666
				721.261	0.26726						720.811	0.28907
				721.27	0.26644						720.82	0.29156
				721.279	0.26555						720.829	0.29415
				721.288	0.26459						720.837	0.29685
				721.297	0.26356						720.846	0.29964
				721.306	0.26246						720.855	0.30254
				721.315	0.26127						720.863	0.30554
				721.324	0.26001						720.872	0.30865
				721.333	0.25867						720.881	0.31185
				721.342	0.25726						720.889	0.31515
				721.351	0.25576						720.898	0.31855
				721.36	0.25419						720.907	0.32204
				721.369	0.25254						720.915	0.32561
				721.378	0.25082						720.924	0.32925
				721.387	0.24904						720.933	0.33296
				721.396	0.24719						720.941	0.33672
				721.405	0.24527						720.95	0.34053
				721.414	0.24331						720.959	0.34438
				721.423	0.24128						720.967	0.34825
				721.432	0.23921						720.976	0.35212
				721.441	0.2371						720.985	0.35599
				721.45	0.23495						720.993	0.35984
				721.459	0.23277						721.002	0.36365
				721.468	0.23056						721.01	0.36741
				721.477	0.22833						721.019	0.3711
				721.486	0.22608						721.028	0.37471
				721.495	0.22382						721.036	0.37822
				721.504	0.22156						721.045	0.38161
				721.513	0.2193						721.054	0.38487
				721.522	0.21704						721.062	0.38798
				721.531	0.2148						721.071	0.39092
				721.54	0.21256						721.08	0.39369
				721.549	0.21034						721.088	0.39628
				721.558	0.20815						721.097	0.39866
				721.567	0.20598						721.106	0.40082
				721.576	0.20384						721.114	0.40276
				721.585	0.20173						721.123	0.40447
				721.594	0.19965						721.132	0.40594
				721.603	0.19761						721.14	0.40717
				721.612	0.1956						721.149	0.40814
				721.621	0.19364						721.158	0.40886
				721.63	0.19171						721.166	0.40933
				721.639	0.18982						721.175	0.40953
				721.648	0.18798						721.184	0.40948
				721.657	0.18617						721.192	0.40918
				721.666	0.18441						721.201	0.40863
				721.675	0.18268						721.21	0.40783
				721.684	0.18099						721.218	0.40679
				721.693	0.17934						721.227	0.40551
				721.702	0.17773						721.236	0.40401
				721.711	0.17615						721.244	0.40228
				721.72	0.1746						721.253	0.40035
				721.729	0.17309						721.262	0.39821
				721.738	0.1716						721.27	0.39588
				721.747	0.17015						721.279	0.39337
				721.756	0.16871						721.288	0.39068
				721.765	0.1673						721.296	0.38783
				721.774	0.16591						721.305	0.38482
				721.783	0.16455						721.314	0.38167
				721.792	0.1632						721.322	0.37838
				721.801	0.16186						721.331	0.37497
				721.81	0.16054						721.34	0.37143
				721.819	0.15923						721.348	0.36779
				721.828	0.15793						721.357	0.36404
				721.837	0.15664						721.365	0.36019
				721.846	0.15536						721.374	0.35625
				721.855	0.15409						721.383	0.35222
				721.864	0.15282						721.391	0.34811
				721.873	0.15156						721.4	0.34393
				721.881	0.1503						721.409	0.33967
				721.89	0.14905						721.417	0.33535
[truncated: 1,005 more rows]
